# Supplementary material for: Development of Plastid Genomic Resources for Discrimination and Classification of Epimedium wushanense (Berberidaceae)
Source: PubMed Central journal article supplement (PMC6720487; doi:10.3390/ijms20164003), 2019-08-16
Supplement: ijms-20-04003-s001.pdf [file ijms-20-04003-s001.pdf]

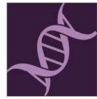

Article

# Development of Plastid Genomic Resources for Discrimination and Classification of *Epimedium wushanense* (Berberidaceae)

Mengyue Guo <sup>1,†</sup>, Li Ren <sup>1,†</sup>, Yanqin Xu <sup>2</sup>, Baosheng Liao <sup>3</sup>, Jingyuan Song <sup>1,4</sup>, Ying Li <sup>1,4</sup>, Nitin Mantri <sup>5</sup>, Baolin Guo <sup>1</sup>, Shilin Chen <sup>3,4</sup> and Xiaohui Pang <sup>1,4,\*</sup>

<sup>1</sup> Key Lab of Chinese Medicine Resources Conservation, State Administration of Traditional Chinese Medicine of the People’s Republic of China, Institute of Medicinal Plant Development, Chinese Academy of Medical Sciences & Peking Union Medical College, Beijing 100193, China

<sup>2</sup> College of Pharmacy, Jiangxi University of Traditional Chinese Medicine, Nanchang 330004, China

<sup>3</sup> Institute of Chinese Materia Medica, China Academy of Chinese Medical Sciences, Beijing 100700, China

<sup>4</sup> Engineering Research Center of Tradition Chinese Medicine Resource, Ministry of Education, Institute of Medicinal Plant Development, Chinese Academy of Medical Sciences & Peking Union Medical College, Beijing 100193, China

<sup>5</sup> The Pangenomics Group, School of Science, RMIT University, Melbourne 3083, Australia

\* Correspondence: xhpang@implad.ac.cn; Tel.: +86-10-5783-3051

† These authors contributed equally to this work.

**Table S1.** Primers used for genome sequence validation.

| Name of primers | Primer sequences 5’-3’ | Samples                                          | Location  |
|-----------------|------------------------|--------------------------------------------------|-----------|
| SMG1F           | TGCATATTGATTTCCACCTA   | SCMP                                             | GAP       |
| SMG1R           | TCTTTAACACCCGCTTTG     | SCMP                                             | GAP       |
| SMG2F           | GGTATTCAATCGCATCAA     | SCMP                                             | GAP       |
| SMG2R           | GTTTGTAACAATAGGGAC     | SCMP                                             | GAP       |
| rpl32_1F        | TTGTTTCCGATTCACCAG     | SCMP                                             | Gene loss |
| rpl32_1R        | TTCTAATCCCTATCCCAC     | SCMP                                             | Gene loss |
| AH2F            | CAGGCTTATGATATTTGTTC   | GZJH, HBES, HBXS, SCMP, GZQB, HBXS-2, GZLS, SXBX | IRA-SSC   |
| AH2R            | GCGGTCGAATTTCTTCTT     | GZJH, HBES, HBXS, SCMP, GZQB, HBXS-2, GZLS       | IRA-SSC   |
| BJ3F            | ACGGAGACTGGTGCGAATG    | GZNW, SXBX                                       | IRA-SSC   |

|         |                        |                                                     |         |
|---------|------------------------|-----------------------------------------------------|---------|
| BJ3R    | TCCCAACCCGAGTATGAA     | GZNW                                                | IRA-SSC |
| DW3R    | TAAGCCAAGTCCCAACCC     | SXBX                                                | IRA-SSC |
| GJ1-4F  | AAATAAAGCGTTGGGTCG     | GZJH, GZNW, GZLS                                    | IRB-LSC |
| GJ1-4R  | GGTTGGGTCGTTCTTG       | GZJH, GZLS                                          | IRB-LSC |
| GZQB-4F | CTGTTCCGTTATTGAGGA     | GZQB, HBXS-2                                        | IRB-LSC |
| GZQB-4R | AAGAGGTTGGGTCGTTCT     | GZQB                                                | IRB-LSC |
| HE4F    | CGGAAAGAGTCGAAGAA      | HBES                                                | IRB-LSC |
| HE4R    | TTGTAAAGAGGTTGGGTC     | HBES, HBXS-2                                        | IRB-LSC |
| HX1-4F  | AAAAGTTCGGTTATTGAG     | HBXS                                                | IRB-LSC |
| HX1-4R  | GAGGTTGGGTCGTTCTTG     | HBXS, SCMP                                          | IRB-LSC |
| SM4F    | ATGATCGGCCATAACAATT    | SCMP                                                | IRB-LSC |
| NW2R    | TTGGGTTAAGAAGTTGAGAA   | GZNW                                                | IRB-LSC |
| DW2F    | ACTTCATAACACGGCGATAC   | SXBX                                                | IRB-LSC |
| DW2R    | CAAAGTACATAGGCATT      | SXBX                                                | IRB-LSC |
| GJ1-1F  | CGGTTCTGTCGGTGCTTC     | GZJH                                                | LSC-IRA |
| GJ2-1R  | ACAGAAATAAAGCGTTGG     | GZQB, GZLS                                          | LSC-IRA |
| GZQB-1F | ATTCGCCTCTGACCATCA     | GZQB                                                | LSC-IRA |
| HE1F    | CTTTCAATTGCGCTCTGA     | HBES                                                | LSC-IRA |
| HE1R    | GAAATAAAGCGTTGGGTC     | HBES                                                | LSC-IRA |
| HX1-1F  | CGGTTCTATCGGTGCTTC     | HBXS, HBXS-2                                        | LSC-IRA |
| HX1-1R  | ACTGTTCCGTTATTGAGG     | HBXS, GZJH, HBXS-2                                  | LSC-IRA |
| SM1F    | CTATACGTCCAATCCCTC     | SCMP                                                | LSC-IRA |
| SM1R    | AATGATCGGCCATAACAAT    | SCMP                                                | LSC-IRA |
| BJ1F    | GAAATGTGAATAACTCGTCCTC | GZNW, GZLS, SXBX                                    | LSC-IRA |
| BJ1R    | CAGCGTCGTTGTGGTAAA     | GZNW, SXBX                                          | LSC-IRA |
| AH3R    | CAGGCTTATGATATTTGTTTC  | GZJH, HBES, HBXS, SCMP, HBXS-2,<br>GZNW, GZLS, SXBX | SSC-IRB |
| ZM1-3F  | TCTTTACTCCACGCTTTC     | GZJH, HBES, HBXS, SCMP, HBXS-2,<br>GZLS             | SSC-IRB |
| BJ4F    | GTCTGCCACCTTCTTCTC     | GZNW, SXBX                                          | SSC-IRB |

**Table S2.** Codon usage within the cp genomes of *E. wushanense* and its closely related species.

| Amino acid | Codon | Voucher No. |            |         |            |         |            |         |            |         |            |         |            |         |            |         |            |         |            |
|------------|-------|-------------|------------|---------|------------|---------|------------|---------|------------|---------|------------|---------|------------|---------|------------|---------|------------|---------|------------|
|            |       | HBXS        |            | HBXS-2  |            | GZQB    |            | SCMP    |            | HBES    |            | GZLS    |            | GZJH    |            | GZNW    |            | SXBX    |            |
|            |       | Num ber     | RSCU value | Num ber | RSCU value | Num ber | RSCU value | Num ber | RSCU value | Num ber | RSCU value | Num ber | RSCU value | Num ber | RSCU value | Num ber | RSCU value | Num ber | RSCU value |
| Phe        | UUU   | 981         | 1.28       | 988     | 1.28       | 1063    | 1.29       | 978     | 1.28       | 982     | 1.28       | 988     | 1.28       | 982     | 1.28       | 987     | 1.28       | 988     | 1.28       |
|            | UUC   | 551         | 0.72       | 553     | 0.72       | 582     | 0.71       | 551     | 0.72       | 553     | 0.72       | 554     | 0.72       | 552     | 0.72       | 554     | 0.72       | 553     | 0.72       |
| Leu        | UUA   | 791         | 1.73       | 787     | 1.72       | 703     | 1.74       | 795     | 1.72       | 790     | 1.72       | 790     | 1.72       | 792     | 1.73       | 788     | 1.72       | 787     | 1.72       |
|            | UUG   | 541         | 1.18       | 545     | 1.19       | 495     | 1.22       | 549     | 1.19       | 542     | 1.18       | 546     | 1.19       | 544     | 1.19       | 547     | 1.19       | 545     | 1.19       |
|            | CUU   | 610         | 1.33       | 612     | 1.33       | 536     | 1.32       | 612     | 1.33       | 612     | 1.33       | 612     | 1.33       | 610     | 1.33       | 611     | 1.33       | 612     | 1.33       |
|            | CUC   | 218         | 0.48       | 218     | 0.48       | 216     | 0.53       | 219     | 0.47       | 219     | 0.48       | 218     | 0.48       | 218     | 0.47       | 218     | 0.48       | 218     | 0.48       |
|            | CUA   | 406         | 0.89       | 405     | 0.88       | 318     | 0.78       | 410     | 0.89       | 405     | 0.88       | 403     | 0.88       | 407     | 0.89       | 406     | 0.88       | 406     | 0.89       |
|            | CUG   | 185         | 0.4        | 185     | 0.4        | 163     | 0.4        | 186     | 0.4        | 184     | 0.4        | 183     | 0.4        | 183     | 0.4        | 183     | 0.4        | 183     | 0.4        |
| Ile        | AUU   | 1074        | 1.48       | 1071    | 1.47       | 1003    | 1.47       | 1072    | 1.47       | 1070    | 1.48       | 1072    | 1.47       | 1073    | 1.48       | 1068    | 1.48       | 1075    | 1.48       |
|            | AUC   | 462         | 0.64       | 463     | 0.64       | 477     | 0.7        | 461     | 0.63       | 460     | 0.64       | 464     | 0.64       | 462     | 0.64       | 459     | 0.63       | 463     | 0.64       |
|            | AUA   | 644         | 0.89       | 646     | 0.89       | 563     | 0.83       | 653     | 0.9        | 642     | 0.89       | 645     | 0.89       | 642     | 0.88       | 644     | 0.89       | 643     | 0.88       |
| Met        | AUG   | 602         | 1          | 604     | 1          | 525     | 1          | 607     | 1          | 605     | 1          | 605     | 1          | 603     | 1          | 604     | 1          | 605     | 1          |
| Val        | GUU   | 485         | 1.39       | 482     | 1.4        | 462     | 1.45       | 483     | 1.39       | 480     | 1.38       | 482     | 1.4        | 484     | 1.39       | 478     | 1.39       | 482     | 1.39       |
|            | GUC   | 182         | 0.52       | 178     | 0.52       | 187     | 0.59       | 180     | 0.52       | 182     | 0.52       | 178     | 0.52       | 182     | 0.52       | 177     | 0.51       | 179     | 0.52       |
|            | GUA   | 495         | 1.42       | 492     | 1.42       | 427     | 1.34       | 498     | 1.44       | 496     | 1.43       | 492     | 1.42       | 495     | 1.42       | 492     | 1.43       | 492     | 1.42       |
|            | GUG   | 229         | 0.66       | 230     | 0.67       | 202     | 0.63       | 227     | 0.65       | 231     | 0.67       | 230     | 0.67       | 229     | 0.66       | 231     | 0.67       | 230     | 0.67       |
| Ser        | UCU   | 593         | 1.74       | 593     | 1.73       | 626     | 1.69       | 595     | 1.74       | 592     | 1.74       | 595     | 1.74       | 596     | 1.75       | 595     | 1.74       | 593     | 1.73       |
|            | UCC   | 345         | 1.01       | 350     | 1.02       | 380     | 1.02       | 346     | 1.01       | 345     | 1.01       | 349     | 1.02       | 344     | 1.01       | 349     | 1.02       | 351     | 1.02       |
|            | UCA   | 398         | 1.17       | 398     | 1.16       | 440     | 1.19       | 403     | 1.18       | 398     | 1.17       | 400     | 1.17       | 400     | 1.17       | 400     | 1.17       | 402     | 1.17       |
|            | UCG   | 197         | 0.58       | 199     | 0.58       | 226     | 0.61       | 196     | 0.57       | 197     | 0.58       | 199     | 0.58       | 197     | 0.58       | 197     | 0.58       | 197     | 0.57       |
|            | AGU   | 375         | 1.1        | 377     | 1.1        | 375     | 1.01       | 378     | 1.1        | 375     | 1.1        | 376     | 1.1        | 375     | 1.1        | 377     | 1.1        | 377     | 1.1        |
|            | AGC   | 135         | 0.4        | 137     | 0.4        | 179     | 0.48       | 135     | 0.39       | 135     | 0.4        | 136     | 0.4        | 134     | 0.39       | 136     | 0.4        | 137     | 0.4        |
| Pro        | CCU   | 433         | 1.51       | 433     | 1.52       | 389     | 1.49       | 439     | 1.52       | 428     | 1.5        | 431     | 1.51       | 431     | 1.51       | 431     | 1.51       | 433     | 1.52       |
|            | CCC   | 238         | 0.83       | 238     | 0.83       | 230     | 0.88       | 243     | 0.84       | 240     | 0.84       | 240     | 0.84       | 240     | 0.84       | 239     | 0.84       | 240     | 0.84       |
|            | CCA   | 314         | 1.1        | 312     | 1.09       | 277     | 1.06       | 309     | 1.07       | 310     | 1.09       | 310     | 1.09       | 311     | 1.09       | 309     | 1.09       | 309     | 1.08       |
|            | CCG   | 160         | 0.56       | 160     | 0.56       | 149     | 0.57       | 161     | 0.56       | 160     | 0.56       | 159     | 0.56       | 159     | 0.56       | 159     | 0.56       | 159     | 0.56       |
| Thr        | ACU   | 493         | 1.51       | 492     | 1.51       | 443     | 1.38       | 495     | 1.5        | 493     | 1.52       | 491     | 1.5        | 493     | 1.51       | 491     | 1.51       | 490     | 1.5        |
|            | ACC   | 258         | 0.79       | 256     | 0.78       | 298     | 0.93       | 262     | 0.8        | 257     | 0.79       | 257     | 0.79       | 257     | 0.79       | 256     | 0.79       | 257     | 0.79       |
|            | ACA   | 387         | 1.19       | 386     | 1.18       | 358     | 1.12       | 390     | 1.18       | 382     | 1.17       | 385     | 1.18       | 385     | 1.18       | 385     | 1.18       | 386     | 1.18       |
|            | ACG   | 168         | 0.51       | 171     | 0.52       | 184     | 0.57       | 171     | 0.52       | 169     | 0.52       | 172     | 0.53       | 169     | 0.52       | 172     | 0.53       | 174     | 0.53       |
| Ala        | GCU   | 594         | 1.69       | 593     | 1.69       | 563     | 1.67       | 597     | 1.68       | 594     | 1.69       | 593     | 1.69       | 595     | 1.69       | 593     | 1.69       | 593     | 1.7        |
|            | GCC   | 238         | 0.68       | 238     | 0.68       | 225     | 0.67       | 243     | 0.68       | 239     | 0.68       | 237     | 0.68       | 237     | 0.67       | 237     | 0.68       | 237     | 0.68       |

|      |     |      |      |      |      |     |      |      |      |      |      |      |      |      |      |      |      |      |      |
|------|-----|------|------|------|------|-----|------|------|------|------|------|------|------|------|------|------|------|------|------|
|      | GCA | 368  | 1.05 | 370  | 1.05 | 367 | 1.09 | 377  | 1.06 | 371  | 1.06 | 370  | 1.05 | 370  | 1.05 | 370  | 1.05 | 368  | 1.05 |
|      | GCG | 203  | 0.58 | 202  | 0.58 | 191 | 0.57 | 208  | 0.58 | 202  | 0.57 | 203  | 0.58 | 203  | 0.58 | 203  | 0.58 | 201  | 0.57 |
| Tyr  | UAU | 732  | 1.6  | 729  | 1.59 | 782 | 1.53 | 733  | 1.6  | 731  | 1.6  | 729  | 1.59 | 730  | 1.6  | 729  | 1.59 | 735  | 1.6  |
|      | UAC | 183  | 0.4  | 186  | 0.41 | 241 | 0.47 | 186  | 0.4  | 184  | 0.4  | 187  | 0.41 | 184  | 0.4  | 187  | 0.41 | 185  | 0.4  |
| His  | CAU | 469  | 1.49 | 466  | 1.49 | 478 | 1.5  | 477  | 1.5  | 469  | 1.49 | 466  | 1.49 | 468  | 1.49 | 466  | 1.49 | 465  | 1.49 |
|      | CAC | 160  | 0.51 | 159  | 0.51 | 158 | 0.5  | 160  | 0.5  | 159  | 0.51 | 159  | 0.51 | 160  | 0.51 | 159  | 0.51 | 159  | 0.51 |
| Gln  | CAA | 705  | 1.49 | 702  | 1.49 | 661 | 1.5  | 707  | 1.5  | 704  | 1.49 | 703  | 1.49 | 704  | 1.49 | 701  | 1.49 | 700  | 1.49 |
|      | CAG | 241  | 0.51 | 241  | 0.51 | 218 | 0.5  | 238  | 0.5  | 240  | 0.51 | 240  | 0.51 | 240  | 0.51 | 240  | 0.51 | 240  | 0.51 |
| Asn  | AAU | 911  | 1.55 | 912  | 1.55 | 871 | 1.5  | 919  | 1.55 | 912  | 1.55 | 914  | 1.55 | 910  | 1.55 | 911  | 1.55 | 910  | 1.55 |
|      | AAC | 261  | 0.45 | 263  | 0.45 | 288 | 0.5  | 267  | 0.45 | 261  | 0.45 | 264  | 0.45 | 262  | 0.45 | 264  | 0.45 | 264  | 0.45 |
| Lys  | AAA | 1017 | 1.41 | 1011 | 1.41 | 979 | 1.42 | 1013 | 1.4  | 1015 | 1.4  | 1010 | 1.41 | 1017 | 1.41 | 1004 | 1.4  | 1013 | 1.4  |
|      | AAG | 430  | 0.59 | 427  | 0.59 | 398 | 0.58 | 431  | 0.6  | 430  | 0.6  | 427  | 0.59 | 429  | 0.59 | 427  | 0.6  | 429  | 0.6  |
| Asp  | GAU | 900  | 1.6  | 896  | 1.59 | 736 | 1.51 | 895  | 1.6  | 894  | 1.6  | 895  | 1.59 | 896  | 1.6  | 891  | 1.59 | 898  | 1.6  |
|      | GAC | 223  | 0.4  | 229  | 0.41 | 237 | 0.49 | 225  | 0.4  | 222  | 0.4  | 229  | 0.41 | 223  | 0.4  | 229  | 0.41 | 228  | 0.4  |
| Glu  | GAA | 985  | 1.38 | 983  | 1.38 | 898 | 1.4  | 983  | 1.38 | 984  | 1.39 | 986  | 1.38 | 989  | 1.38 | 984  | 1.39 | 984  | 1.38 |
|      | GAG | 442  | 0.62 | 440  | 0.62 | 385 | 0.6  | 441  | 0.62 | 436  | 0.61 | 440  | 0.62 | 440  | 0.62 | 436  | 0.61 | 439  | 0.62 |
| Cys  | UGU | 214  | 1.45 | 215  | 1.45 | 250 | 1.26 | 216  | 1.46 | 214  | 1.45 | 214  | 1.45 | 214  | 1.45 | 214  | 1.45 | 213  | 1.44 |
|      | UGC | 82   | 0.55 | 81   | 0.55 | 147 | 0.74 | 80   | 0.54 | 82   | 0.55 | 82   | 0.55 | 82   | 0.55 | 82   | 0.55 | 82   | 0.56 |
| Trp  | UGG | 459  | 1    | 461  | 1    | 446 | 1    | 457  | 1    | 456  | 1    | 461  | 1    | 458  | 1    | 457  | 1    | 463  | 1    |
| Arg  | CGU | 321  | 1.21 | 318  | 1.2  | 290 | 1.01 | 328  | 1.22 | 321  | 1.21 | 318  | 1.2  | 321  | 1.21 | 318  | 1.2  | 317  | 1.2  |
|      | CGC | 107  | 0.4  | 107  | 0.41 | 99  | 0.34 | 108  | 0.4  | 107  | 0.4  | 107  | 0.4  | 107  | 0.4  | 107  | 0.4  | 107  | 0.4  |
|      | CGA | 345  | 1.3  | 343  | 1.3  | 372 | 1.29 | 347  | 1.29 | 345  | 1.3  | 343  | 1.3  | 345  | 1.3  | 342  | 1.29 | 344  | 1.3  |
|      | CGG | 124  | 0.47 | 124  | 0.47 | 128 | 0.44 | 123  | 0.46 | 124  | 0.47 | 124  | 0.47 | 124  | 0.47 | 125  | 0.47 | 124  | 0.47 |
|      | AGA | 479  | 1.81 | 480  | 1.82 | 588 | 2.04 | 490  | 1.82 | 478  | 1.8  | 481  | 1.82 | 480  | 1.81 | 482  | 1.82 | 481  | 1.82 |
|      | AGG | 213  | 0.8  | 213  | 0.81 | 252 | 0.87 | 215  | 0.8  | 214  | 0.81 | 214  | 0.81 | 215  | 0.81 | 213  | 0.81 | 213  | 0.81 |
| Gly  | GGU | 552  | 1.26 | 554  | 1.27 | 522 | 1.19 | 566  | 1.27 | 553  | 1.26 | 554  | 1.27 | 553  | 1.26 | 554  | 1.27 | 555  | 1.27 |
|      | GGC | 205  | 0.47 | 205  | 0.47 | 217 | 0.49 | 205  | 0.46 | 205  | 0.47 | 205  | 0.47 | 205  | 0.47 | 205  | 0.47 | 204  | 0.47 |
|      | GGA | 653  | 1.49 | 647  | 1.48 | 672 | 1.53 | 659  | 1.48 | 653  | 1.49 | 647  | 1.48 | 654  | 1.49 | 647  | 1.48 | 648  | 1.48 |
|      | GGG | 343  | 0.78 | 342  | 0.78 | 350 | 0.8  | 352  | 0.79 | 344  | 0.78 | 340  | 0.78 | 340  | 0.78 | 340  | 0.78 | 341  | 0.78 |
| Stop | UAA | 37   | 1.34 | 41   | 1.4  | 207 | 1.08 | 36   | 1.3  | 35   | 1.27 | 40   | 1.36 | 36   | 1.3  | 40   | 1.36 | 41   | 1.4  |
|      | UAG | 24   | 0.87 | 25   | 0.85 | 112 | 0.59 | 25   | 0.9  | 24   | 0.87 | 25   | 0.85 | 24   | 0.87 | 25   | 0.85 | 25   | 0.85 |
|      | UGA | 22   | 0.8  | 22   | 0.75 | 254 | 1.33 | 22   | 0.8  | 24   | 0.87 | 23   | 0.78 | 23   | 0.83 | 23   | 0.78 | 22   | 0.75 |

Table S3. Distribution of SSR loci in the cp genomes of *E. wushanense* and its closely related species.

| Genomes/SSR No.           | SSR type | Repeat motif | size (bp) | Start | End | Region |
|---------------------------|----------|--------------|-----------|-------|-----|--------|
| Epimedium wushanense_HBXS |          |              |           |       |     |        |
| 1                         | p1       | (A)11        | 11        | 251   | 261 | LSC    |

|    |    |          |    |       |       |     |
|----|----|----------|----|-------|-------|-----|
| 2  | p1 | (A)10    | 10 | 4013  | 4022  | LSC |
| 3  | p1 | (A)12    | 12 | 4855  | 4866  | LSC |
| 4  | p1 | (T)10    | 10 | 5599  | 5608  | LSC |
| 5  | p1 | (T)12    | 12 | 6532  | 6543  | LSC |
| 6  | p1 | (T)10    | 10 | 7466  | 7475  | LSC |
| 7  | p1 | (A)10    | 10 | 8030  | 8039  | LSC |
| 8  | p1 | (A)12    | 12 | 8578  | 8589  | LSC |
| 9  | p1 | (T)10    | 10 | 8603  | 8612  | LSC |
| 10 | p1 | (A)11    | 11 | 8804  | 8814  | LSC |
| 11 | p1 | (A)10    | 10 | 13013 | 13022 | LSC |
| 12 | p1 | (A)10    | 10 | 13678 | 13687 | LSC |
| 13 | p5 | (AGATA)3 | 15 | 14773 | 14787 | LSC |
| 14 | p1 | (T)10    | 10 | 18845 | 18854 | LSC |
| 15 | p1 | (T)13    | 13 | 22984 | 22996 | LSC |
| 16 | p1 | (T)10    | 10 | 26635 | 26644 | LSC |
| 17 | p1 | (A)11    | 11 | 28199 | 28209 | LSC |
| 18 | p1 | (A)10    | 10 | 29142 | 29151 | LSC |
| 19 | p1 | (T)10    | 10 | 29560 | 29569 | LSC |
| 20 | p1 | (T)10    | 10 | 30261 | 30270 | LSC |
| 21 | p1 | (T)12    | 12 | 31687 | 31698 | LSC |
| 22 | p1 | (G)11    | 11 | 35486 | 35496 | LSC |
| 23 | p1 | (A)13    | 13 | 38508 | 38520 | LSC |
| 24 | p1 | (C)10    | 10 | 41478 | 41487 | LSC |
| 25 | p1 | (T)10    | 10 | 43122 | 43131 | LSC |
| 26 | p3 | (ATA)4   | 12 | 43345 | 43356 | LSC |
| 27 | p1 | (A)11    | 11 | 43721 | 43731 | LSC |
| 28 | p1 | (T)12    | 12 | 44052 | 44063 | LSC |
| 29 | p1 | (T)10    | 10 | 44528 | 44537 | LSC |
| 30 | p1 | (T)11    | 11 | 45549 | 45559 | LSC |
| 31 | p1 | (A)12    | 12 | 45618 | 45629 | LSC |
| 32 | p1 | (A)11    | 11 | 45875 | 45885 | LSC |
| 33 | p1 | (T)11    | 11 | 47629 | 47639 | LSC |

|    |    |        |    |        |        |     |
|----|----|--------|----|--------|--------|-----|
| 34 | p1 | (T)10  | 10 | 48341  | 48350  | LSC |
| 35 | p2 | (TA)6  | 12 | 49920  | 49931  | LSC |
| 36 | p1 | (T)11  | 11 | 50562  | 50572  | LSC |
| 37 | p1 | (T)10  | 10 | 54162  | 54171  | LSC |
| 38 | p1 | (A)12  | 12 | 57593  | 57604  | LSC |
| 39 | p3 | (GGA)4 | 12 | 60717  | 60728  | LSC |
| 40 | p1 | (A)12  | 12 | 61927  | 61938  | LSC |
| 41 | p1 | (A)11  | 11 | 62212  | 62222  | LSC |
| 42 | p1 | (T)10  | 10 | 63266  | 63275  | LSC |
| 43 | p1 | (A)10  | 10 | 65320  | 65329  | LSC |
| 44 | p1 | (T)10  | 10 | 65677  | 65686  | LSC |
| 45 | p1 | (A)10  | 10 | 66287  | 66296  | LSC |
| 46 | p1 | (A)12  | 12 | 66916  | 66927  | LSC |
| 47 | p1 | (T)13  | 13 | 66988  | 67000  | LSC |
| 48 | p1 | (A)11  | 11 | 68865  | 68875  | LSC |
| 49 | p1 | (T)14  | 14 | 69004  | 69017  | LSC |
| 50 | p1 | (T)12  | 12 | 72029  | 72040  | LSC |
| 51 | p1 | (A)11  | 11 | 72307  | 72317  | LSC |
| 52 | p1 | (T)14  | 14 | 73008  | 73021  | LSC |
| 53 | p1 | (T)10  | 10 | 73739  | 73748  | LSC |
| 54 | p1 | (T)11  | 11 | 73951  | 73961  | LSC |
| 55 | p1 | (T)10  | 10 | 77811  | 77820  | LSC |
| 56 | p1 | (A)10  | 10 | 78050  | 78059  | LSC |
| 57 | p1 | (T)12  | 12 | 78183  | 78194  | LSC |
| 58 | p1 | (A)10  | 10 | 82762  | 82771  | LSC |
| 59 | p1 | (T)14  | 14 | 83272  | 83285  | LSC |
| 60 | p1 | (A)13  | 13 | 84382  | 84394  | LSC |
| 61 | p1 | (T)15  | 15 | 85161  | 85175  | LSC |
| 62 | p1 | (T)11  | 11 | 85264  | 85274  | LSC |
| 63 | p1 | (T)10  | 10 | 85542  | 85551  | LSC |
| 64 | p1 | (A)10  | 10 | 92132  | 92141  | IRA |
| 65 | p1 | (A)13  | 13 | 112817 | 112829 | IRA |

|                                   |    |        |    |        |        |     |
|-----------------------------------|----|--------|----|--------|--------|-----|
| 66                                | p3 | (AGG)4 | 12 | 114217 | 114228 | IRA |
| 67                                | p1 | (T)14  | 14 | 116808 | 116821 | SSC |
| 68                                | p1 | (A)10  | 10 | 116871 | 116880 | SSC |
| 69                                | p1 | (A)11  | 11 | 116937 | 116947 | SSC |
| 70                                | p1 | (T)11  | 11 | 117578 | 117588 | SSC |
| 71                                | p2 | (AT)8  | 16 | 117798 | 117813 | SSC |
| 72                                | p1 | (T)16  | 16 | 117923 | 117938 | SSC |
| 73                                | p1 | (T)10  | 10 | 122334 | 122343 | SSC |
| 74                                | p1 | (A)13  | 13 | 124770 | 124782 | SSC |
| 75                                | p1 | (A)16  | 16 | 131316 | 131331 | IRB |
| 76                                | p3 | (TCC)4 | 12 | 131492 | 131503 | IRB |
| 77                                | p1 | (T)13  | 13 | 132892 | 132904 | IRB |
| 78                                | p1 | (T)10  | 10 | 153580 | 153589 | IRB |
| Epimedium_borealiguizhouense_GZQB |    |        |    |        |        |     |
| 1                                 | p1 | (A)10  | 10 | 4012   | 4021   | LSC |
| 2                                 | p1 | (A)12  | 12 | 4849   | 4860   | LSC |
| 3                                 | p1 | (T)10  | 10 | 7454   | 7463   | LSC |
| 4                                 | p1 | (A)10  | 10 | 8018   | 8027   | LSC |
| 5                                 | p1 | (A)12  | 12 | 8558   | 8569   | LSC |
| 6                                 | p1 | (T)11  | 11 | 8582   | 8592   | LSC |
| 7                                 | p1 | (A)10  | 10 | 8784   | 8793   | LSC |
| 8                                 | p1 | (T)10  | 10 | 10028  | 10037  | LSC |
| 9                                 | p1 | (A)11  | 11 | 12984  | 12994  | LSC |
| 10                                | p1 | (A)10  | 10 | 13648  | 13657  | LSC |
| 11                                | p1 | (A)14  | 14 | 15027  | 15040  | LSC |
| 12                                | p1 | (T)10  | 10 | 18815  | 18824  | LSC |
| 13                                | p1 | (T)10  | 10 | 22954  | 22963  | LSC |
| 14                                | p1 | (T)10  | 10 | 26602  | 26611  | LSC |
| 15                                | p1 | (A)11  | 11 | 28160  | 28170  | LSC |
| 16                                | p1 | (T)10  | 10 | 30242  | 30251  | LSC |
| 17                                | p1 | (T)12  | 12 | 31668  | 31679  | LSC |
| 18                                | p1 | (G)11  | 11 | 35467  | 35477  | LSC |

|    |    |        |    |       |       |     |
|----|----|--------|----|-------|-------|-----|
| 19 | p1 | (A)11  | 11 | 38495 | 38505 | LSC |
| 20 | p1 | (C)10  | 10 | 41463 | 41472 | LSC |
| 21 | p1 | (T)11  | 11 | 43107 | 43117 | LSC |
| 22 | p3 | (ATA)6 | 18 | 43326 | 43343 | LSC |
| 23 | p1 | (A)13  | 13 | 43709 | 43721 | LSC |
| 24 | p1 | (T)11  | 11 | 45535 | 45545 | LSC |
| 25 | p1 | (A)14  | 14 | 45605 | 45618 | LSC |
| 26 | p1 | (A)10  | 10 | 45864 | 45873 | LSC |
| 27 | p1 | (T)10  | 10 | 47619 | 47628 | LSC |
| 28 | p2 | (TA)6  | 12 | 49907 | 49918 | LSC |
| 29 | p1 | (T)12  | 12 | 49995 | 50006 | LSC |
| 30 | p1 | (T)11  | 11 | 50560 | 50570 | LSC |
| 31 | p1 | (T)13  | 13 | 54035 | 54047 | LSC |
| 32 | p1 | (T)10  | 10 | 54168 | 54177 | LSC |
| 33 | p1 | (A)12  | 12 | 57595 | 57606 | LSC |
| 34 | p3 | (GGA)4 | 12 | 60720 | 60731 | LSC |
| 35 | p1 | (A)14  | 14 | 61923 | 61936 | LSC |
| 36 | p3 | (AAG)4 | 12 | 62204 | 62215 | LSC |
| 37 | p1 | (T)10  | 10 | 63268 | 63277 | LSC |
| 38 | p1 | (T)10  | 10 | 65473 | 65482 | LSC |
| 39 | p1 | (T)13  | 13 | 65679 | 65691 | LSC |
| 40 | p1 | (A)10  | 10 | 66292 | 66301 | LSC |
| 41 | p1 | (A)11  | 11 | 66921 | 66931 | LSC |
| 42 | p1 | (T)16  | 16 | 66991 | 67006 | LSC |
| 43 | p1 | (A)11  | 11 | 68300 | 68310 | LSC |
| 44 | p1 | (A)10  | 10 | 68872 | 68881 | LSC |
| 45 | p1 | (T)14  | 14 | 69016 | 69029 | LSC |
| 46 | p1 | (T)15  | 15 | 69910 | 69924 | LSC |
| 47 | p1 | (T)11  | 11 | 72053 | 72063 | LSC |
| 48 | p1 | (A)13  | 13 | 72375 | 72387 | LSC |
| 49 | p1 | (A)14  | 14 | 72922 | 72935 | LSC |
| 50 | p1 | (T)14  | 14 | 73086 | 73099 | LSC |



|                            |    |        |    |        |        |     |
|----------------------------|----|--------|----|--------|--------|-----|
| 51                         | p1 | (T)11  | 11 | 73817  | 73827  | LSC |
| 52                         | p1 | (T)11  | 11 | 74030  | 74040  | LSC |
| 53                         | p1 | (T)11  | 11 | 77890  | 77900  | LSC |
| 54                         | p1 | (A)10  | 10 | 78130  | 78139  | LSC |
| 55                         | p1 | (T)10  | 10 | 78263  | 78272  | LSC |
| 56                         | p1 | (A)11  | 11 | 82840  | 82850  | LSC |
| 57                         | p1 | (T)14  | 14 | 83351  | 83364  | LSC |
| 58                         | p1 | (A)12  | 12 | 84462  | 84473  | LSC |
| 59                         | p1 | (T)12  | 12 | 85089  | 85100  | LSC |
| 60                         | p1 | (T)15  | 15 | 85242  | 85256  | LSC |
| 61                         | p1 | (T)11  | 11 | 85345  | 85355  | LSC |
| 62                         | p1 | (A)10  | 10 | 92212  | 92221  | LSC |
| 63                         | p1 | (A)13  | 13 | 112903 | 112915 | IRA |
| 64                         | p3 | (AGG)4 | 12 | 114303 | 114314 | IRA |
| 65                         | p1 | (T)15  | 15 | 116904 | 116918 | SSC |
| 66                         | p1 | (T)11  | 11 | 117665 | 117675 | SSC |
| 67                         | p1 | (T)15  | 15 | 118004 | 118018 | SSC |
| 68                         | p1 | (A)13  | 13 | 124848 | 124860 | SSC |
| 69                         | p1 | (A)16  | 16 | 131387 | 131402 | IRB |
| 70                         | p3 | (TCC)4 | 12 | 131569 | 131580 | IRB |
| 71                         | p1 | (T)13  | 13 | 132969 | 132981 | IRB |
| 72                         | p1 | (T)10  | 10 | 153663 | 153672 | IRB |
| Epimedium chlorandrum_SCMP |    |        |    |        |        |     |
| 1                          | p1 | (A)10  | 10 | 256    | 265    | LSC |
| 2                          | p1 | (A)12  | 12 | 4018   | 4029   | LSC |
| 3                          | p1 | (A)10  | 10 | 4855   | 4864   | LSC |
| 4                          | p1 | (T)10  | 10 | 5604   | 5613   | LSC |
| 5                          | p1 | (T)11  | 11 | 6534   | 6544   | LSC |
| 6                          | p1 | (T)11  | 11 | 7467   | 7477   | LSC |
| 7                          | p1 | (A)11  | 11 | 8032   | 8042   | LSC |
| 8                          | p1 | (A)10  | 10 | 8491   | 8500   | LSC |
| 9                          | p1 | (A)10  | 10 | 8581   | 8590   | LSC |

|    |    |          |    |       |       |     |
|----|----|----------|----|-------|-------|-----|
| 10 | p1 | (T)10    | 10 | 8602  | 8611  | LSC |
| 11 | p1 | (A)12    | 12 | 8803  | 8814  | LSC |
| 12 | p1 | (T)11    | 11 | 10058 | 10068 | LSC |
| 13 | p1 | (A)12    | 12 | 13015 | 13026 | LSC |
| 14 | p1 | (A)10    | 10 | 13675 | 13684 | LSC |
| 15 | p5 | (AGATA)3 | 15 | 14770 | 14784 | LSC |
| 16 | p1 | (A)10    | 10 | 15059 | 15068 | LSC |
| 17 | p1 | (T)10    | 10 | 18843 | 18852 | LSC |
| 18 | p1 | (T)10    | 10 | 22982 | 22991 | LSC |
| 19 | p1 | (T)10    | 10 | 26630 | 26639 | LSC |
| 20 | p1 | (T)10    | 10 | 30256 | 30265 | LSC |
| 21 | p1 | (T)11    | 11 | 31682 | 31692 | LSC |
| 22 | p1 | (G)11    | 11 | 35479 | 35489 | LSC |
| 23 | p1 | (A)13    | 13 | 38511 | 38523 | LSC |
| 24 | p1 | (C)10    | 10 | 41481 | 41490 | LSC |
| 25 | p1 | (T)11    | 11 | 43125 | 43135 | LSC |
| 26 | p3 | (ATA)4   | 12 | 43349 | 43360 | LSC |
| 27 | p1 | (A)12    | 12 | 43726 | 43737 | LSC |
| 28 | p1 | (T)11    | 11 | 45551 | 45561 | LSC |
| 29 | p1 | (A)13    | 13 | 45621 | 45633 | LSC |
| 30 | p1 | (A)11    | 11 | 45879 | 45889 | LSC |
| 31 | p1 | (T)10    | 10 | 47634 | 47643 | LSC |
| 32 | p2 | (TA)6    | 12 | 49922 | 49933 | LSC |
| 33 | p1 | (T)11    | 11 | 50582 | 50592 | LSC |
| 34 | p4 | (TAAA)4  | 16 | 52743 | 52758 | LSC |
| 35 | p1 | (T)13    | 13 | 54049 | 54061 | LSC |
| 36 | p1 | (T)10    | 10 | 54182 | 54191 | LSC |
| 37 | p1 | (A)14    | 14 | 57614 | 57627 | LSC |
| 38 | p1 | (G)10    | 10 | 57628 | 57637 | LSC |
| 39 | p3 | (GGA)4   | 12 | 60754 | 60765 | LSC |
| 40 | p1 | (A)14    | 14 | 61964 | 61977 | LSC |
| 41 | p3 | (AAG)4   | 12 | 62239 | 62250 | LSC |

|    |    |        |    |        |        |     |
|----|----|--------|----|--------|--------|-----|
| 42 | p1 | (T)10  | 10 | 63303  | 63312  | LSC |
| 43 | p1 | (A)10  | 10 | 65357  | 65366  | LSC |
| 44 | p1 | (T)11  | 11 | 65714  | 65724  | LSC |
| 45 | p1 | (A)10  | 10 | 66325  | 66334  | LSC |
| 46 | p1 | (A)12  | 12 | 66954  | 66965  | LSC |
| 47 | p1 | (T)16  | 16 | 67025  | 67040  | LSC |
| 48 | p1 | (A)13  | 13 | 68334  | 68346  | LSC |
| 49 | p1 | (A)12  | 12 | 68908  | 68919  | LSC |
| 50 | p1 | (T)15  | 15 | 69054  | 69068  | LSC |
| 51 | p1 | (A)10  | 10 | 71532  | 71541  | LSC |
| 52 | p1 | (T)11  | 11 | 72086  | 72096  | LSC |
| 53 | p1 | (A)14  | 14 | 72408  | 72421  | LSC |
| 54 | p1 | (A)10  | 10 | 72956  | 72965  | LSC |
| 55 | p1 | (T)14  | 14 | 73116  | 73129  | LSC |
| 56 | p1 | (T)11  | 11 | 73847  | 73857  | LSC |
| 57 | p1 | (T)10  | 10 | 74060  | 74069  | LSC |
| 58 | p1 | (T)10  | 10 | 77919  | 77928  | LSC |
| 59 | p1 | (A)10  | 10 | 78158  | 78167  | LSC |
| 60 | p1 | (T)10  | 10 | 78291  | 78300  | LSC |
| 61 | p1 | (A)11  | 11 | 82862  | 82872  | LSC |
| 62 | p1 | (T)14  | 14 | 83373  | 83386  | LSC |
| 63 | p1 | (A)12  | 12 | 84483  | 84494  | LSC |
| 64 | p1 | (T)12  | 12 | 85116  | 85127  | LSC |
| 65 | p1 | (T)10  | 10 | 85366  | 85375  | LSC |
| 66 | p1 | (T)10  | 10 | 85643  | 85652  | LSC |
| 67 | p1 | (A)13  | 13 | 112861 | 112873 | IRA |
| 68 | p3 | (AGG)4 | 12 | 114222 | 114233 | IRA |
| 69 | p1 | (T)15  | 15 | 116809 | 116823 | SSC |
| 70 | p1 | (A)10  | 10 | 116945 | 116954 | SSC |
| 71 | p1 | (T)12  | 12 | 117076 | 117087 | SSC |
| 72 | p3 | (TTA)5 | 15 | 117429 | 117443 | SSC |
| 73 | p1 | (T)10  | 10 | 117461 | 117470 | SSC |

|                                 |    |          |    |        |        |     |
|---------------------------------|----|----------|----|--------|--------|-----|
| 74                              | p1 | (A)14    | 14 | 123927 | 123940 | SSC |
| 75                              | p1 | (T)10    | 10 | 126711 | 126720 | SSC |
| 76                              | p1 | (A)13    | 13 | 130468 | 130480 | IRB |
| 77                              | p3 | (TCC)4   | 12 | 130644 | 130655 | IRB |
| 78                              | p1 | (T)13    | 13 | 132005 | 132017 | IRB |
| Epimedium pseudowushanense_GZJH |    |          |    |        |        |     |
| 1                               | p1 | (A)11    | 11 | 259    | 269    | LSC |
| 2                               | p1 | (A)11    | 11 | 4021   | 4031   | LSC |
| 3                               | p1 | (A)12    | 12 | 4861   | 4872   | LSC |
| 4                               | p1 | (T)10    | 10 | 5605   | 5614   | LSC |
| 5                               | p1 | (T)11    | 11 | 6541   | 6551   | LSC |
| 6                               | p1 | (T)10    | 10 | 7474   | 7483   | LSC |
| 7                               | p1 | (A)10    | 10 | 8038   | 8047   | LSC |
| 8                               | p1 | (A)11    | 11 | 8586   | 8596   | LSC |
| 9                               | p1 | (T)12    | 12 | 8614   | 8625   | LSC |
| 10                              | p1 | (A)15    | 15 | 8817   | 8831   | LSC |
| 11                              | p1 | (A)10    | 10 | 13030  | 13039  | LSC |
| 12                              | p1 | (A)10    | 10 | 13696  | 13705  | LSC |
| 13                              | p5 | (AGATA)3 | 15 | 14796  | 14810  | LSC |
| 14                              | p1 | (A)13    | 13 | 15085  | 15097  | LSC |
| 15                              | p1 | (T)10    | 10 | 18872  | 18881  | LSC |
| 16                              | p1 | (T)11    | 11 | 23011  | 23021  | LSC |
| 17                              | p1 | (T)10    | 10 | 26660  | 26669  | LSC |
| 18                              | p1 | (A)10    | 10 | 28218  | 28227  | LSC |
| 19                              | p1 | (T)10    | 10 | 29459  | 29468  | LSC |
| 20                              | p1 | (T)10    | 10 | 30160  | 30169  | LSC |
| 21                              | p1 | (T)12    | 12 | 31587  | 31598  | LSC |
| 22                              | p1 | (G)11    | 11 | 35385  | 35395  | LSC |
| 23                              | p1 | (A)15    | 15 | 38399  | 38413  | LSC |
| 24                              | p1 | (C)10    | 10 | 41371  | 41380  | LSC |
| 25                              | p1 | (T)10    | 10 | 43015  | 43024  | LSC |
| 26                              | p3 | (ATA)4   | 12 | 43238  | 43249  | LSC |

|    |    |        |    |       |       |     |
|----|----|--------|----|-------|-------|-----|
| 27 | p1 | (T)10  | 10 | 43942 | 43951 | LSC |
| 28 | p1 | (T)11  | 11 | 45436 | 45446 | LSC |
| 29 | p1 | (A)14  | 14 | 45505 | 45518 | LSC |
| 30 | p1 | (A)11  | 11 | 45764 | 45774 | LSC |
| 31 | p1 | (T)10  | 10 | 47525 | 47534 | LSC |
| 32 | p2 | (TA)6  | 12 | 49813 | 49824 | LSC |
| 33 | p1 | (T)10  | 10 | 50448 | 50457 | LSC |
| 34 | p1 | (A)10  | 10 | 53120 | 53129 | LSC |
| 35 | p1 | (T)13  | 13 | 53914 | 53926 | LSC |
| 36 | p1 | (T)10  | 10 | 54057 | 54066 | LSC |
| 37 | p1 | (A)12  | 12 | 57488 | 57499 | LSC |
| 38 | p3 | (GGA)4 | 12 | 60611 | 60622 | LSC |
| 39 | p1 | (A)19  | 19 | 61782 | 61800 | LSC |
| 40 | p1 | (T)12  | 12 | 63126 | 63137 | LSC |
| 41 | p1 | (A)10  | 10 | 65182 | 65191 | LSC |
| 42 | p1 | (T)12  | 12 | 65334 | 65345 | LSC |
| 43 | p1 | (T)12  | 12 | 65542 | 65553 | LSC |
| 44 | p1 | (A)10  | 10 | 66154 | 66163 | LSC |
| 45 | p1 | (A)12  | 12 | 66783 | 66794 | LSC |
| 46 | p1 | (T)15  | 15 | 66854 | 66868 | LSC |
| 47 | p1 | (A)11  | 11 | 68725 | 68735 | LSC |
| 48 | p1 | (T)17  | 17 | 68870 | 68886 | LSC |
| 49 | p1 | (T)11  | 11 | 71895 | 71905 | LSC |
| 50 | p1 | (A)13  | 13 | 72212 | 72224 | LSC |
| 51 | p1 | (A)13  | 13 | 72759 | 72771 | LSC |
| 52 | p1 | (T)14  | 14 | 72922 | 72935 | LSC |
| 53 | p1 | (T)11  | 11 | 73659 | 73669 | LSC |
| 54 | p1 | (T)11  | 11 | 73872 | 73882 | LSC |
| 55 | p1 | (T)11  | 11 | 77732 | 77742 | LSC |
| 56 | p1 | (A)10  | 10 | 77972 | 77981 | LSC |
| 57 | p1 | (T)13  | 13 | 78105 | 78117 | LSC |
| 58 | p1 | (T)10  | 10 | 82648 | 82657 | LSC |

|                          |    |          |    |        |        |     |
|--------------------------|----|----------|----|--------|--------|-----|
| 59                       | p1 | (A)10    | 10 | 82689  | 82698  | LSC |
| 60                       | p1 | (T)15    | 15 | 83199  | 83213  | LSC |
| 61                       | p1 | (A)13    | 13 | 84317  | 84329  | LSC |
| 62                       | p1 | (T)12    | 12 | 84937  | 84948  | LSC |
| 63                       | p1 | (T)13    | 13 | 85090  | 85102  | LSC |
| 64                       | p1 | (T)11    | 11 | 85191  | 85201  | LSC |
| 65                       | p1 | (A)10    | 10 | 92058  | 92067  | IRA |
| 66                       | p1 | (A)13    | 13 | 112730 | 112742 | IRA |
| 67                       | p3 | (AGG)4   | 12 | 114130 | 114141 | IRA |
| 68                       | p1 | (T)14    | 14 | 116720 | 116733 | SSC |
| 69                       | p1 | (A)10    | 10 | 116848 | 116857 | SSC |
| 70                       | p1 | (T)11    | 11 | 117487 | 117497 | SSC |
| 71                       | p2 | (AT)7    | 14 | 117707 | 117720 | SSC |
| 72                       | p1 | (T)15    | 15 | 117830 | 117844 | SSC |
| 73                       | p1 | (A)13    | 13 | 124669 | 124681 | SSC |
| 74                       | p1 | (A)13    | 13 | 131208 | 131220 | IRB |
| 75                       | p3 | (TCC)4   | 12 | 131384 | 131395 | IRB |
| 76                       | p1 | (T)13    | 13 | 132784 | 132796 | IRB |
| 77                       | p1 | (T)10    | 10 | 153459 | 153468 | IRB |
| Epimedium mikinorii_HBES |    |          |    |        |        |     |
| 1                        | p1 | (A)10    | 10 | 4011   | 4020   | LSC |
| 2                        | p1 | (A)11    | 11 | 4866   | 4876   | LSC |
| 3                        | p1 | (T)10    | 10 | 7480   | 7489   | LSC |
| 4                        | p1 | (A)11    | 11 | 8044   | 8054   | LSC |
| 5                        | p1 | (A)12    | 12 | 8588   | 8599   | LSC |
| 6                        | p1 | (T)11    | 11 | 8612   | 8622   | LSC |
| 7                        | p1 | (A)14    | 14 | 8814   | 8827   | LSC |
| 8                        | p1 | (A)10    | 10 | 13683  | 13692  | LSC |
| 9                        | p5 | (AGATA)3 | 15 | 14778  | 14792  | LSC |
| 10                       | p1 | (A)13    | 13 | 15066  | 15078  | LSC |
| 11                       | p1 | (T)10    | 10 | 18853  | 18862  | LSC |
| 12                       | p1 | (T)10    | 10 | 22992  | 23001  | LSC |

|     |    |        |    |       |       |     |
|-----|----|--------|----|-------|-------|-----|
| 13  | p1 | (A)10  | 10 | 28198 | 28207 | LSC |
| 14  | p1 | (T)10  | 10 | 30267 | 30276 | LSC |
| 15  | p1 | (T)12  | 12 | 31685 | 31696 | LSC |
| 16  | p1 | (G)11  | 11 | 35475 | 35485 | LSC |
| 17  | p1 | (A)12  | 12 | 38492 | 38503 | LSC |
| 18  | p1 | (C)10  | 10 | 41461 | 41470 | LSC |
| 19  | p1 | (T)10  | 10 | 43090 | 43099 | LSC |
| 20  | p3 | (ATA)4 | 12 | 43313 | 43324 | LSC |
| 21  | p1 | (A)13  | 13 | 43669 | 43681 | LSC |
| 22  | p1 | (T)12  | 12 | 45495 | 45506 | LSC |
| 23  | p1 | (A)12  | 12 | 45565 | 45576 | LSC |
| 24  | p1 | (A)11  | 11 | 45822 | 45832 | LSC |
| 25  | p1 | (T)10  | 10 | 47577 | 47586 | LSC |
| 26  | p2 | (TA)6  | 12 | 49865 | 49876 | LSC |
| 27  | p1 | (T)10  | 10 | 50500 | 50509 | LSC |
| 28  | p1 | (A)11  | 11 | 53172 | 53182 | LSC |
| 29  | p1 | (T)10  | 10 | 53966 | 53975 | LSC |
| 30  | p1 | (A)12  | 12 | 57527 | 57538 | LSC |
| 31  | p3 | (GGA)4 | 12 | 60652 | 60663 | LSC |
| 32  | p1 | (A)15  | 15 | 61854 | 61868 | LSC |
| 33  | p3 | (CTT)4 | 12 | 62074 | 62085 | LSC |
| 34* | p1 | (T)11  | 11 | 62086 | 62096 | LSC |
| 35  | p1 | (T)10  | 10 | 63191 | 63200 | LSC |
| 36  | p1 | (T)11  | 11 | 65601 | 65611 | LSC |
| 37  | p1 | (A)10  | 10 | 66212 | 66221 | LSC |
| 38  | p1 | (A)12  | 12 | 66841 | 66852 | LSC |
| 39  | p1 | (T)12  | 12 | 66912 | 66923 | LSC |
| 40  | p1 | (A)11  | 11 | 68787 | 68797 | LSC |
| 41  | p1 | (T)20  | 20 | 68932 | 68951 | LSC |
| 42  | p1 | (A)10  | 10 | 71416 | 71425 | LSC |
| 43  | p1 | (T)10  | 10 | 71970 | 71979 | LSC |
| 44  | p1 | (A)13  | 13 | 72222 | 72234 | LSC |

|                          |    |        |    |        |        |     |
|--------------------------|----|--------|----|--------|--------|-----|
| 45                       | p1 | (A)14  | 14 | 72769  | 72782  | LSC |
| 46                       | p1 | (T)11  | 11 | 72933  | 72943  | LSC |
| 47                       | p1 | (T)10  | 10 | 73661  | 73670  | LSC |
| 48                       | p1 | (T)11  | 11 | 73873  | 73883  | LSC |
| 49                       | p1 | (T)10  | 10 | 77733  | 77742  | LSC |
| 50                       | p1 | (A)10  | 10 | 77972  | 77981  | LSC |
| 51                       | p1 | (T)11  | 11 | 78105  | 78115  | LSC |
| 52                       | p1 | (T)14  | 14 | 83129  | 83142  | LSC |
| 53                       | p1 | (A)13  | 13 | 84239  | 84251  | LSC |
| 54                       | p1 | (T)11  | 11 | 84867  | 84877  | LSC |
| 55                       | p1 | (T)15  | 15 | 85019  | 85033  | LSC |
| 56                       | p1 | (T)10  | 10 | 85122  | 85131  | LSC |
| 57                       | p1 | (A)10  | 10 | 91988  | 91997  | IRA |
| 58                       | p1 | (A)13  | 13 | 112637 | 112649 | IRA |
| 59                       | p3 | (AGG)4 | 12 | 114037 | 114048 | IRA |
| 60                       | p1 | (T)14  | 14 | 116619 | 116632 | SSC |
| 61                       | p1 | (A)11  | 11 | 116754 | 116764 | SSC |
| 62                       | p1 | (T)11  | 11 | 117386 | 117396 | SSC |
| 63                       | p2 | (AT)6  | 12 | 117606 | 117617 | SSC |
| 64                       | p1 | (T)13  | 13 | 117727 | 117739 | SSC |
| 65                       | p1 | (T)10  | 10 | 122143 | 122152 | SSC |
| 66                       | p1 | (A)13  | 13 | 124573 | 124585 | SSC |
| 67                       | p1 | (T)11  | 11 | 127361 | 127371 | SSC |
| 68                       | p1 | (A)13  | 13 | 131119 | 131131 | IRB |
| 69                       | p3 | (TCC)4 | 12 | 131295 | 131306 | IRB |
| 70                       | p1 | (T)13  | 13 | 132695 | 132707 | IRB |
| 71                       | p1 | (T)10  | 10 | 153347 | 153356 | IRB |
| Epimedium mikinorii_GZLS |    |        |    |        |        |     |
| 1                        | p1 | (A)11  | 11 | 259    | 269    | LSC |
| 2                        | p1 | (A)11  | 11 | 4021   | 4031   | LSC |
| 3                        | p1 | (A)10  | 10 | 4857   | 4866   | LSC |
| 4                        | p1 | (T)10  | 10 | 5599   | 5608   | LSC |



|    |    |          |    |       |       |     |
|----|----|----------|----|-------|-------|-----|
| 5  | p1 | (T)11    | 11 | 6530  | 6540  | LSC |
| 6  | p1 | (T)10    | 10 | 7463  | 7472  | LSC |
| 7  | p1 | (A)10    | 10 | 8036  | 8045  | LSC |
| 8  | p1 | (A)11    | 11 | 8584  | 8594  | LSC |
| 9  | p1 | (T)12    | 12 | 8612  | 8623  | LSC |
| 10 | p1 | (A)12    | 12 | 8815  | 8826  | LSC |
| 11 | p1 | (A)10    | 10 | 13025 | 13034 | LSC |
| 12 | p1 | (A)10    | 10 | 13683 | 13692 | LSC |
| 13 | p5 | (AGATA)3 | 15 | 14779 | 14793 | LSC |
| 14 | p1 | (A)14    | 14 | 15068 | 15081 | LSC |
| 15 | p1 | (T)10    | 10 | 18856 | 18865 | LSC |
| 16 | p1 | (T)11    | 11 | 22995 | 23005 | LSC |
| 17 | p1 | (T)10    | 10 | 26644 | 26653 | LSC |
| 18 | p1 | (T)10    | 10 | 29556 | 29565 | LSC |
| 19 | p1 | (T)10    | 10 | 30257 | 30266 | LSC |
| 20 | p1 | (T)12    | 12 | 31684 | 31695 | LSC |
| 21 | p1 | (G)11    | 11 | 35482 | 35492 | LSC |
| 22 | p1 | (A)15    | 15 | 38499 | 38513 | LSC |
| 23 | p1 | (C)10    | 10 | 41471 | 41480 | LSC |
| 24 | p1 | (T)10    | 10 | 43104 | 43113 | LSC |
| 25 | p3 | (ATA)4   | 12 | 43327 | 43338 | LSC |
| 26 | p1 | (T)10    | 10 | 44031 | 44040 | LSC |
| 27 | p1 | (T)10    | 10 | 45525 | 45534 | LSC |
| 28 | p1 | (A)14    | 14 | 45593 | 45606 | LSC |
| 29 | p1 | (A)11    | 11 | 45852 | 45862 | LSC |
| 30 | p1 | (T)11    | 11 | 47607 | 47617 | LSC |
| 31 | p2 | (TA)6    | 12 | 49902 | 49913 | LSC |
| 32 | p1 | (T)10    | 10 | 50537 | 50546 | LSC |
| 33 | p1 | (T)12    | 12 | 54001 | 54012 | LSC |
| 34 | p1 | (T)10    | 10 | 54133 | 54142 | LSC |
| 35 | p1 | (A)12    | 12 | 57564 | 57575 | LSC |
| 36 | p3 | (GGA)4   | 12 | 60675 | 60686 | LSC |

|    |    |        |    |        |        |     |
|----|----|--------|----|--------|--------|-----|
| 37 | p1 | (A)19  | 19 | 61852  | 61870  | LSC |
| 38 | p1 | (T)11  | 11 | 63196  | 63206  | LSC |
| 39 | p1 | (A)11  | 11 | 65251  | 65261  | LSC |
| 40 | p1 | (T)12  | 12 | 65404  | 65415  | LSC |
| 41 | p1 | (T)12  | 12 | 65612  | 65623  | LSC |
| 42 | p1 | (A)10  | 10 | 66224  | 66233  | LSC |
| 43 | p1 | (A)10  | 10 | 66853  | 66862  | LSC |
| 44 | p1 | (T)15  | 15 | 66922  | 66936  | LSC |
| 45 | p1 | (A)11  | 11 | 68793  | 68803  | LSC |
| 46 | p1 | (T)16  | 16 | 68938  | 68953  | LSC |
| 47 | p1 | (T)10  | 10 | 71969  | 71978  | LSC |
| 48 | p1 | (A)13  | 13 | 72291  | 72303  | LSC |
| 49 | p1 | (A)13  | 13 | 72838  | 72850  | LSC |
| 50 | p1 | (T)14  | 14 | 73001  | 73014  | LSC |
| 51 | p1 | (T)11  | 11 | 73738  | 73748  | LSC |
| 52 | p1 | (T)11  | 11 | 73951  | 73961  | LSC |
| 53 | p1 | (T)11  | 11 | 77811  | 77821  | LSC |
| 54 | p1 | (A)11  | 11 | 78051  | 78061  | LSC |
| 55 | p1 | (T)12  | 12 | 78185  | 78196  | LSC |
| 56 | p1 | (T)10  | 10 | 82726  | 82735  | LSC |
| 57 | p1 | (T)14  | 14 | 83275  | 83288  | LSC |
| 58 | p1 | (A)13  | 13 | 84384  | 84396  | LSC |
| 59 | p1 | (T)12  | 12 | 85004  | 85015  | LSC |
| 60 | p1 | (T)10  | 10 | 85092  | 85101  | LSC |
| 61 | p1 | (T)17  | 17 | 85157  | 85173  | LSC |
| 62 | p1 | (T)11  | 11 | 85263  | 85273  | LSC |
| 63 | p1 | (T)10  | 10 | 85541  | 85550  | LSC |
| 64 | p1 | (A)10  | 10 | 92131  | 92140  | IRA |
| 65 | p1 | (A)13  | 13 | 112807 | 112819 | IRA |
| 66 | p3 | (AGG)4 | 12 | 114207 | 114218 | IRA |
| 67 | p1 | (T)14  | 14 | 116803 | 116816 | SSC |
| 68 | p1 | (A)10  | 10 | 116931 | 116940 | SSC |

|                                 |    |          |    |        |        |     |
|---------------------------------|----|----------|----|--------|--------|-----|
| 69                              | p1 | (T)11    | 11 | 117328 | 117338 | SSC |
| 70                              | p2 | (AT)7    | 14 | 117548 | 117561 | SSC |
| 71                              | p1 | (T)14    | 14 | 117671 | 117684 | SSC |
| 72                              | p1 | (A)13    | 13 | 124509 | 124521 | SSC |
| 73                              | p1 | (A)13    | 13 | 131048 | 131060 | IRB |
| 74                              | p3 | (TCC)4   | 12 | 131224 | 131235 | IRB |
| 75                              | p1 | (T)13    | 13 | 132624 | 132636 | IRB |
| 76                              | p1 | (T)10    | 10 | 153303 | 153312 | IRB |
| Epimedium pseudowushanense_GZNW |    |          |    |        |        |     |
| 1                               | p1 | (A)11    | 11 | 259    | 269    | LSC |
| 2                               | p1 | (A)11    | 11 | 4028   | 4038   | LSC |
| 3                               | p1 | (A)11    | 11 | 4864   | 4874   | LSC |
| 4                               | p1 | (T)10    | 10 | 5607   | 5616   | LSC |
| 5                               | p1 | (T)11    | 11 | 6538   | 6548   | LSC |
| 6                               | p1 | (T)10    | 10 | 7471   | 7480   | LSC |
| 7                               | p1 | (A)10    | 10 | 8035   | 8044   | LSC |
| 8                               | p1 | (A)12    | 12 | 8583   | 8594   | LSC |
| 9                               | p1 | (T)11    | 11 | 8612   | 8622   | LSC |
| 10                              | p1 | (A)13    | 13 | 8814   | 8826   | LSC |
| 11                              | p1 | (A)10    | 10 | 13016  | 13025  | LSC |
| 12                              | p1 | (A)10    | 10 | 13674  | 13683  | LSC |
| 13                              | p5 | (AGATA)3 | 15 | 14770  | 14784  | LSC |
| 14                              | p1 | (A)14    | 14 | 15059  | 15072  | LSC |
| 15                              | p1 | (T)10    | 10 | 18847  | 18856  | LSC |
| 16                              | p1 | (T)11    | 11 | 22986  | 22996  | LSC |
| 17                              | p1 | (T)10    | 10 | 26635  | 26644  | LSC |
| 18                              | p1 | (T)10    | 10 | 29572  | 29581  | LSC |
| 19                              | p1 | (T)10    | 10 | 30273  | 30282  | LSC |
| 20                              | p1 | (T)12    | 12 | 31700  | 31711  | LSC |
| 21                              | p1 | (G)11    | 11 | 35498  | 35508  | LSC |
| 22                              | p1 | (A)16    | 16 | 38512  | 38527  | LSC |
| 23                              | p1 | (C)10    | 10 | 41485  | 41494  | LSC |

|    |    |        |    |       |       |     |
|----|----|--------|----|-------|-------|-----|
| 24 | p1 | (T)10  | 10 | 43129 | 43138 | LSC |
| 25 | p3 | (ATA)4 | 12 | 43352 | 43363 | LSC |
| 26 | p1 | (T)10  | 10 | 44056 | 44065 | LSC |
| 27 | p1 | (T)10  | 10 | 45550 | 45559 | LSC |
| 28 | p1 | (A)14  | 14 | 45618 | 45631 | LSC |
| 29 | p1 | (A)11  | 11 | 45877 | 45887 | LSC |
| 30 | p1 | (T)10  | 10 | 47632 | 47641 | LSC |
| 31 | p2 | (TA)6  | 12 | 49920 | 49931 | LSC |
| 32 | p1 | (T)10  | 10 | 50555 | 50564 | LSC |
| 33 | p1 | (T)13  | 13 | 54020 | 54032 | LSC |
| 34 | p1 | (T)10  | 10 | 54153 | 54162 | LSC |
| 35 | p1 | (A)13  | 13 | 57584 | 57596 | LSC |
| 36 | p3 | (GGA)4 | 12 | 60708 | 60719 | LSC |
| 37 | p1 | (A)18  | 18 | 61879 | 61896 | LSC |
| 38 | p1 | (T)12  | 12 | 63222 | 63233 | LSC |
| 39 | p1 | (A)10  | 10 | 65278 | 65287 | LSC |
| 40 | p1 | (T)11  | 11 | 65430 | 65440 | LSC |
| 41 | p1 | (T)12  | 12 | 65637 | 65648 | LSC |
| 42 | p1 | (A)10  | 10 | 66249 | 66258 | LSC |
| 43 | p1 | (A)10  | 10 | 66878 | 66887 | LSC |
| 44 | p1 | (T)15  | 15 | 66947 | 66961 | LSC |
| 45 | p1 | (A)12  | 12 | 68818 | 68829 | LSC |
| 46 | p1 | (T)16  | 16 | 68964 | 68979 | LSC |
| 47 | p1 | (T)11  | 11 | 71995 | 72005 | LSC |
| 48 | p1 | (A)13  | 13 | 72318 | 72330 | LSC |
| 49 | p1 | (A)13  | 13 | 72865 | 72877 | LSC |
| 50 | p1 | (T)13  | 13 | 73028 | 73040 | LSC |
| 51 | p1 | (T)10  | 10 | 73764 | 73773 | LSC |
| 52 | p1 | (T)11  | 11 | 73976 | 73986 | LSC |
| 53 | p1 | (T)11  | 11 | 77836 | 77846 | LSC |
| 54 | p1 | (A)10  | 10 | 78076 | 78085 | LSC |
| 55 | p1 | (T)11  | 11 | 78209 | 78219 | LSC |

|                             |    |           |    |        |        |     |
|-----------------------------|----|-----------|----|--------|--------|-----|
| 56                          | p1 | (T)10     | 10 | 82749  | 82758  | LSC |
| 57                          | p1 | (T)13     | 13 | 83298  | 83310  | LSC |
| 58                          | p1 | (A)13     | 13 | 84406  | 84418  | LSC |
| 59                          | p1 | (T)12     | 12 | 85026  | 85037  | LSC |
| 60                          | p1 | (T)12     | 12 | 85179  | 85190  | LSC |
| 61                          | p1 | (T)11     | 11 | 85279  | 85289  | LSC |
| 62                          | p1 | (T)10     | 10 | 85557  | 85566  | LSC |
| 63                          | p1 | (A)10     | 10 | 92153  | 92162  | IRA |
| 64                          | p1 | (A)12     | 12 | 112829 | 112840 | IRA |
| 65                          | p3 | (AGG)4    | 12 | 114228 | 114239 | IRA |
| 66                          | p6 | (CAACGA)3 | 18 | 114228 | 114245 | IRA |
| 67                          | p1 | (T)14     | 14 | 116824 | 116837 | SSC |
| 68                          | p1 | (A)10     | 10 | 116952 | 116961 | SSC |
| 69                          | p1 | (T)11     | 11 | 117591 | 117601 | SSC |
| 70                          | p2 | (AT)7     | 14 | 117811 | 117824 | SSC |
| 71                          | p1 | (T)15     | 15 | 117934 | 117948 | SSC |
| 72                          | p1 | (A)14     | 14 | 124773 | 124786 | SSC |
| 73                          | p1 | (T)11     | 11 | 127557 | 127567 | SSC |
| 74                          | p1 | (A)13     | 13 | 131315 | 131327 | IRB |
| 75                          | p3 | (TCC)4    | 12 | 131491 | 131502 | IRB |
| 76                          | p1 | (T)12     | 12 | 132891 | 132902 | IRB |
| 77                          | p1 | (T)10     | 10 | 153569 | 153578 | IRB |
| Epimedium wushanense_HBXS-2 |    |           |    |        |        |     |
| 1                           | p1 | (A)11     | 11 | 248    | 258    | LSC |
| 2                           | p1 | (A)10     | 10 | 4010   | 4019   | LSC |
| 3                           | p1 | (A)11     | 11 | 4845   | 4855   | LSC |
| 4                           | p1 | (T)10     | 10 | 5588   | 5597   | LSC |
| 5                           | p1 | (T)12     | 12 | 6521   | 6532   | LSC |
| 6                           | p1 | (T)10     | 10 | 7455   | 7464   | LSC |
| 7                           | p1 | (A)10     | 10 | 8019   | 8028   | LSC |
| 8                           | p1 | (A)16     | 16 | 8562   | 8577   | LSC |
| 9                           | p1 | (T)10     | 10 | 8591   | 8600   | LSC |

|    |    |        |    |       |       |     |
|----|----|--------|----|-------|-------|-----|
| 10 | p1 | (A)11  | 11 | 8792  | 8802  | LSC |
| 11 | p1 | (A)10  | 10 | 12987 | 12996 | LSC |
| 12 | p1 | (A)11  | 11 | 13652 | 13662 | LSC |
| 13 | p1 | (T)10  | 10 | 18815 | 18824 | LSC |
| 14 | p1 | (T)13  | 13 | 22954 | 22966 | LSC |
| 15 | p1 | (T)10  | 10 | 26605 | 26614 | LSC |
| 16 | p2 | (AT)6  | 12 | 27389 | 27400 | LSC |
| 17 | p1 | (A)10  | 10 | 28171 | 28180 | LSC |
| 18 | p1 | (T)10  | 10 | 29531 | 29540 | LSC |
| 19 | p1 | (T)10  | 10 | 30232 | 30241 | LSC |
| 20 | p1 | (T)12  | 12 | 31658 | 31669 | LSC |
| 21 | p1 | (G)11  | 11 | 35471 | 35481 | LSC |
| 22 | p1 | (A)15  | 15 | 38500 | 38514 | LSC |
| 23 | p1 | (C)10  | 10 | 41472 | 41481 | LSC |
| 24 | p1 | (T)10  | 10 | 43116 | 43125 | LSC |
| 25 | p1 | (A)10  | 10 | 43720 | 43729 | LSC |
| 26 | p1 | (T)10  | 10 | 44050 | 44059 | LSC |
| 27 | p1 | (T)10  | 10 | 44524 | 44533 | LSC |
| 28 | p1 | (T)10  | 10 | 45545 | 45554 | LSC |
| 29 | p1 | (A)12  | 12 | 45613 | 45624 | LSC |
| 30 | p1 | (A)11  | 11 | 45870 | 45880 | LSC |
| 31 | p1 | (T)10  | 10 | 47624 | 47633 | LSC |
| 32 | p1 | (T)10  | 10 | 48335 | 48344 | LSC |
| 33 | p2 | (TA)6  | 12 | 49914 | 49925 | LSC |
| 34 | p1 | (T)13  | 13 | 50556 | 50568 | LSC |
| 35 | p1 | (T)10  | 10 | 54158 | 54167 | LSC |
| 36 | p1 | (A)12  | 12 | 57589 | 57600 | LSC |
| 37 | p3 | (GGA)4 | 12 | 60713 | 60724 | LSC |
| 38 | p1 | (A)12  | 12 | 61918 | 61929 | LSC |
| 39 | p1 | (A)11  | 11 | 62203 | 62213 | LSC |
| 40 | p1 | (T)10  | 10 | 63257 | 63266 | LSC |
| 41 | p1 | (A)11  | 11 | 65311 | 65321 | LSC |

|    |    |        |    |        |        |     |
|----|----|--------|----|--------|--------|-----|
| 42 | p1 | (T)10  | 10 | 65464  | 65473  | LSC |
| 43 | p1 | (T)10  | 10 | 65670  | 65679  | LSC |
| 44 | p1 | (A)10  | 10 | 66280  | 66289  | LSC |
| 45 | p1 | (A)11  | 11 | 66909  | 66919  | LSC |
| 46 | p1 | (T)13  | 13 | 66980  | 66992  | LSC |
| 47 | p1 | (A)10  | 10 | 68287  | 68296  | LSC |
| 48 | p1 | (A)11  | 11 | 68858  | 68868  | LSC |
| 49 | p1 | (T)14  | 14 | 68997  | 69010  | LSC |
| 50 | p1 | (T)11  | 11 | 72022  | 72032  | LSC |
| 51 | p1 | (A)11  | 11 | 72344  | 72354  | LSC |
| 52 | p1 | (A)14  | 14 | 72887  | 72900  | LSC |
| 53 | p1 | (T)14  | 14 | 73051  | 73064  | LSC |
| 54 | p1 | (T)10  | 10 | 73782  | 73791  | LSC |
| 55 | p1 | (T)11  | 11 | 73994  | 74004  | LSC |
| 56 | p1 | (T)10  | 10 | 77854  | 77863  | LSC |
| 57 | p1 | (A)10  | 10 | 78099  | 78108  | LSC |
| 58 | p1 | (T)10  | 10 | 78232  | 78241  | LSC |
| 59 | p1 | (A)11  | 11 | 82809  | 82819  | LSC |
| 60 | p1 | (T)14  | 14 | 83320  | 83333  | LSC |
| 61 | p1 | (A)13  | 13 | 84430  | 84442  | LSC |
| 62 | p1 | (T)11  | 11 | 85064  | 85074  | LSC |
| 63 | p1 | (T)16  | 16 | 85216  | 85231  | LSC |
| 64 | p1 | (T)10  | 10 | 85320  | 85329  | LSC |
| 65 | p1 | (T)10  | 10 | 85597  | 85606  | LSC |
| 66 | p1 | (A)10  | 10 | 92187  | 92196  | IRA |
| 67 | p1 | (A)13  | 13 | 112863 | 112875 | IRA |
| 68 | p3 | (AGG)4 | 12 | 114263 | 114274 | IRA |
| 69 | p1 | (T)14  | 14 | 116861 | 116874 | SSC |
| 70 | p1 | (A)10  | 10 | 116925 | 116934 | SSC |
| 71 | p1 | (A)10  | 10 | 116990 | 116999 | SSC |
| 72 | p1 | (T)11  | 11 | 117630 | 117640 | SSC |
| 73 | p2 | (AT)8  | 16 | 117850 | 117865 | SSC |

|                            |    |        |    |        |        |     |
|----------------------------|----|--------|----|--------|--------|-----|
| 74                         | p1 | (T)16  | 16 | 117975 | 117990 | SSC |
| 75                         | p1 | (A)13  | 13 | 124822 | 124834 | SSC |
| 76                         | p1 | (A)16  | 16 | 131361 | 131376 | IRB |
| 77                         | p3 | (TCC)4 | 12 | 131537 | 131548 | IRB |
| 78                         | p1 | (T)13  | 13 | 132937 | 132949 | IRB |
| 79                         | p1 | (T)10  | 10 | 153616 | 153625 | IRB |
| Epimedium ilicifolium_SXBX |    |        |    |        |        |     |
| 1                          | p1 | (A)12  | 12 | 4017   | 4028   | LSC |
| 2                          | p1 | (A)12  | 12 | 4854   | 4865   | LSC |
| 3                          | p1 | (T)10  | 10 | 5598   | 5607   | LSC |
| 4                          | p1 | (T)10  | 10 | 6529   | 6538   | LSC |
| 5                          | p1 | (T)10  | 10 | 7461   | 7470   | LSC |
| 6                          | p1 | (A)11  | 11 | 8025   | 8035   | LSC |
| 7                          | p1 | (A)10  | 10 | 8574   | 8583   | LSC |
| 8                          | p1 | (T)11  | 11 | 8595   | 8605   | LSC |
| 9                          | p1 | (A)12  | 12 | 8797   | 8808   | LSC |
| 10                         | p1 | (A)11  | 11 | 13002  | 13012  | LSC |
| 11                         | p1 | (A)10  | 10 | 13661  | 13670  | LSC |
| 12                         | p1 | (A)14  | 14 | 15041  | 15054  | LSC |
| 13                         | p1 | (T)10  | 10 | 18829  | 18838  | LSC |
| 14                         | p1 | (T)12  | 12 | 22968  | 22979  | LSC |
| 15                         | p1 | (T)10  | 10 | 26618  | 26627  | LSC |
| 16                         | p1 | (A)11  | 11 | 28176  | 28186  | LSC |
| 17                         | p1 | (T)10  | 10 | 29531  | 29540  | LSC |
| 18                         | p1 | (T)11  | 11 | 30247  | 30257  | LSC |
| 19                         | p1 | (T)12  | 12 | 31674  | 31685  | LSC |
| 20                         | p1 | (G)11  | 11 | 35473  | 35483  | LSC |
| 21                         | p1 | (A)11  | 11 | 38505  | 38515  | LSC |
| 22                         | p1 | (C)10  | 10 | 41473  | 41482  | LSC |
| 23                         | p1 | (T)10  | 10 | 43117  | 43126  | LSC |
| 24                         | p3 | (ATA)4 | 12 | 43340  | 43351  | LSC |
| 25                         | p1 | (A)13  | 13 | 43717  | 43729  | LSC |



|    |    |          |    |       |       |     |
|----|----|----------|----|-------|-------|-----|
| 26 | p1 | (T)12    | 12 | 44050 | 44061 | LSC |
| 27 | p1 | (T)10    | 10 | 44526 | 44535 | LSC |
| 28 | p1 | (T)11    | 11 | 45547 | 45557 | LSC |
| 29 | p1 | (A)13    | 13 | 45616 | 45628 | LSC |
| 30 | p1 | (A)11    | 11 | 45874 | 45884 | LSC |
| 31 | p1 | (T)10    | 10 | 47629 | 47638 | LSC |
| 32 | p2 | (TA)6    | 12 | 49909 | 49920 | LSC |
| 33 | p1 | (T)11    | 11 | 50551 | 50561 | LSC |
| 34 | p4 | (TAAA)4  | 16 | 52707 | 52722 | LSC |
| 35 | p1 | (T)11    | 11 | 54006 | 54016 | LSC |
| 36 | p1 | (T)10    | 10 | 54137 | 54146 | LSC |
| 37 | p1 | (A)13    | 13 | 57568 | 57580 | LSC |
| 38 | p5 | (ATTAT)3 | 15 | 59556 | 59570 | LSC |
| 39 | p3 | (GGA)4   | 12 | 60698 | 60709 | LSC |
| 40 | p1 | (A)14    | 14 | 61900 | 61913 | LSC |
| 41 | p3 | (AAG)4   | 12 | 62175 | 62186 | LSC |
| 42 | p1 | (T)11    | 11 | 63239 | 63249 | LSC |
| 43 | p1 | (T)10    | 10 | 65650 | 65659 | LSC |
| 44 | p1 | (A)10    | 10 | 66260 | 66269 | LSC |
| 45 | p1 | (A)12    | 12 | 66889 | 66900 | LSC |
| 46 | p1 | (T)13    | 13 | 66961 | 66973 | LSC |
| 47 | p1 | (A)13    | 13 | 68261 | 68273 | LSC |
| 48 | p1 | (A)11    | 11 | 68829 | 68839 | LSC |
| 49 | p1 | (T)14    | 14 | 68974 | 68987 | LSC |
| 50 | p1 | (T)11    | 11 | 72004 | 72014 | LSC |
| 51 | p1 | (A)13    | 13 | 72289 | 72301 | LSC |
| 52 | p1 | (A)13    | 13 | 72836 | 72848 | LSC |
| 53 | p1 | (T)14    | 14 | 72999 | 73012 | LSC |
| 54 | p1 | (T)11    | 11 | 73730 | 73740 | LSC |
| 55 | p1 | (T)11    | 11 | 73943 | 73953 | LSC |
| 56 | p1 | (T)10    | 10 | 77803 | 77812 | LSC |
| 57 | p1 | (A)10    | 10 | 78042 | 78051 | LSC |

|    |    |        |    |        |        |     |
|----|----|--------|----|--------|--------|-----|
| 58 | p1 | (T)12  | 12 | 78175  | 78186  | LSC |
| 59 | p1 | (T)10  | 10 | 82715  | 82724  | LSC |
| 60 | p1 | (T)15  | 15 | 83264  | 83278  | LSC |
| 61 | p1 | (A)14  | 14 | 84375  | 84388  | LSC |
| 62 | p1 | (T)12  | 12 | 84709  | 84720  | LSC |
| 63 | p1 | (T)10  | 10 | 84959  | 84968  | LSC |
| 64 | p1 | (T)10  | 10 | 85236  | 85245  | LSC |
| 65 | p1 | (A)10  | 10 | 91832  | 91841  | IRA |
| 66 | p1 | (A)13  | 13 | 112519 | 112531 | IRA |
| 67 | p3 | (AGG)4 | 12 | 113919 | 113930 | IRA |
| 68 | p1 | (A)11  | 11 | 116624 | 116634 | SSC |
| 69 | p1 | (T)11  | 11 | 117255 | 117265 | SSC |
| 70 | p2 | (AT)6  | 12 | 117475 | 117486 | SSC |
| 71 | p1 | (T)14  | 14 | 117596 | 117609 | SSC |
| 72 | p1 | (A)13  | 13 | 124420 | 124432 | SSC |
| 73 | p1 | (A)13  | 13 | 130965 | 130977 | IRB |
| 74 | p3 | (TCC)4 | 12 | 131141 | 131152 | IRB |
| 75 | p1 | (T)13  | 13 | 132541 | 132553 | IRB |
| 76 | p1 | (T)10  | 10 | 153231 | 153240 | IRB |

Table S4. Repeated sequences identified in the cp genomes of *E. wushanense* and its closely related species.

| Genomes /SSR No.                | Repeat Type | Length (bp) | Position A | Locus                 | Region | Position B | Locus                 | Region |
|---------------------------------|-------------|-------------|------------|-----------------------|--------|------------|-----------------------|--------|
| <i>Epimedium_wushanense_HBX</i> |             |             |            |                       |        |            |                       |        |
| S                               |             |             |            |                       |        |            |                       |        |
| 1                               | P           | 131         | 5830       | <i>trnK-UUU-rps16</i> | LSC    | 103594     | <i>trnV-GAC-rrm16</i> | IRA    |
| 2                               | F           | 131         | 5830       | <i>trnK-UUU-rps16</i> | LSC    | 141995     | <i>rrn16</i>          | IRB    |
| 3                               | F           | 107         | 4635       | <i>trnK-UUU</i>       | LSC    | 109596     | <i>rrn23</i>          | IRA    |
| 4                               | P           | 107         | 4635       | <i>trnK-UUU</i>       | LSC    | 136017     | <i>rrn23</i>          | IRB    |
| 5                               | P           | 71          | 62228      | <i>accD-psaI</i>      | LSC    | 62228      | <i>accD-psaI</i>      | LSC    |
| 6                               | F           | 77          | 4745       | <i>trnK-UUU</i>       | LSC    | 109708     | <i>rrn23</i>          | IRA    |
| 7                               | P           | 77          | 4745       | <i>trnK-UUU</i>       | LSC    | 135935     | <i>rrn23</i>          | IRB    |

|    |   |    |        |                          |     |        |                          |     |
|----|---|----|--------|--------------------------|-----|--------|--------------------------|-----|
| 8  | F | 77 | 114004 | <i>ycf1</i>              | IRA | 114118 | <i>ycf1</i>              | IRA |
| 9  | P | 77 | 114004 | <i>ycf1</i>              | IRA | 131525 | <i>ycf1</i>              | IRB |
| 10 | P | 77 | 114118 | <i>ycf1</i>              | IRA | 131639 | <i>ycf1</i>              | IRB |
| 11 | F | 77 | 131525 | <i>ycf1</i>              | IRB | 131639 | <i>ycf1</i>              | IRB |
| 12 | F | 62 | 131545 | <i>ycf1</i>              | IRB | 131659 | <i>ycf1</i>              | IRB |
| 13 | F | 53 | 4689   | <i>trnK-UUU</i>          | LSC | 109650 | <i>rrn23</i>             | IRA |
| 14 | P | 53 | 4689   | <i>trnK-UUU</i>          | LSC | 136017 | <i>rrn23</i>             | IRB |
| 15 | P | 48 | 54750  | <i>trnV-UAC-trnM-CAU</i> | LSC | 54750  | <i>trnV-UAC-trnM-CAU</i> | LSC |
| 16 | F | 53 | 113997 | <i>ycf1</i>              | IRA | 114063 | <i>ycf1</i>              | IRA |
| 17 | P | 53 | 113997 | <i>ycf1</i>              | IRA | 131604 | <i>ycf1</i>              | IRB |
| 18 | P | 53 | 114063 | <i>ycf1</i>              | IRA | 131670 | <i>ycf1</i>              | IRB |
| 19 | F | 53 | 131604 | <i>ycf1</i>              | IRB | 131670 | <i>ycf1</i>              | IRB |
| 20 | F | 49 | 4773   | <i>trnK-UUU</i>          | LSC | 109736 | <i>rrn23</i>             | IRA |
| 21 | P | 49 | 4773   | <i>trnK-UUU</i>          | LSC | 135935 | <i>rrn23</i>             | IRB |
| 22 | P | 49 | 98018  | <i>trnL-CAA-ndhB</i>     | IRA | 98018  | <i>trnL-CAA-ndhB</i>     | IRA |
| 23 | F | 49 | 98018  | <i>trnL-CAA-ndhB</i>     | IRA | 147653 | <i>ndhB-trnL-CAA</i>     | IRB |
| 24 | P | 49 | 147653 | <i>ndhB-trnL-CAA</i>     | IRB | 147653 | <i>ndhB-trnL-CAA</i>     | IRB |
| 25 | P | 44 | 29974  | <i>petN-psbM</i>         | LSC | 29974  | <i>petN-psbM</i>         | LSC |
| 26 | F | 50 | 74370  | <i>clpP</i>              | LSC | 74418  | <i>clpP</i>              | LSC |
| 27 | F | 46 | 114070 | <i>ycf1</i>              | IRA | 114118 | <i>ycf1</i>              | IRA |
| 28 | P | 46 | 114070 | <i>ycf1</i>              | IRA | 131556 | <i>ycf1</i>              | IRB |
| 29 | P | 46 | 114118 | <i>ycf1</i>              | IRA | 131604 | <i>ycf1</i>              | IRB |
| 30 | F | 46 | 131556 | <i>ycf1</i>              | IRB | 131604 | <i>ycf1</i>              | IRB |
| 31 | F | 37 | 92083  | <i>ycf2</i>              | IRA | 92140  | <i>ycf2</i>              | IRA |
| 32 | P | 37 | 92083  | <i>ycf2</i>              | IRA | 153543 | <i>ycf2</i>              | IRB |
| 33 | P | 37 | 92140  | <i>ycf2</i>              | IRA | 153600 | <i>ycf2</i>              | IRB |
| 34 | F | 37 | 153543 | <i>ycf2</i>              | IRB | 153600 | <i>ycf2</i>              | IRB |
| 35 | F | 40 | 131617 | <i>ycf1</i>              | IRB | 131683 | <i>ycf1</i>              | IRB |
| 36 | P | 35 | 5926   | <i>trnK-UUU-rps16</i>    | LSC | 103594 | <i>trnV-GAC-rrn16</i>    | IRA |
| 37 | F | 35 | 5926   | <i>trnK-UUU-rps16</i>    | LSC | 142091 | <i>rrn16-trnV-GAC</i>    | IRB |
| 38 | P | 35 | 65749  | <i>petA-psbJ</i>         | LSC | 65791  | <i>petA-psbJ</i>         | LSC |
| 39 | F | 44 | 94749  | <i>ycf2</i>              | IRA | 94758  | <i>ycf2</i>              | IRA |

|                                          |   |     |        |                          |     |        |                          |     |
|------------------------------------------|---|-----|--------|--------------------------|-----|--------|--------------------------|-----|
| 40                                       | P | 44  | 94749  | <i>ycf2</i>              | IRA | 150918 | <i>ycf2</i>              | IRB |
| 41                                       | P | 44  | 94758  | <i>ycf2</i>              | IRA | 150927 | <i>ycf2</i>              | IRB |
| 42                                       | F | 44  | 150918 | <i>ycf2</i>              | IRB | 150927 | <i>ycf2</i>              | IRB |
| 43                                       | P | 43  | 49687  | <i>trnL-UAA-trnF-GAA</i> | LSC | 49687  | <i>trnL-UAA-trnF-GAA</i> | LSC |
| 44                                       | F | 43  | 113915 | <i>ycf1</i>              | IRA | 113927 | <i>ycf1</i>              | IRA |
| 45                                       | P | 43  | 113915 | <i>ycf1</i>              | IRA | 131750 | <i>ycf1</i>              | IRB |
| 46                                       | P | 43  | 113927 | <i>ycf1</i>              | IRA | 131762 | <i>ycf1</i>              | IRB |
| 47                                       | F | 43  | 131750 | <i>ycf1</i>              | IRB | 131762 | <i>ycf1</i>              | IRB |
| 48                                       | P | 33  | 36465  | <i>psbC-trnS-UGA</i>     | LSC | 36510  | <i>psbC-trnS-UGA</i>     | LSC |
| 49                                       | F | 33  | 131569 | <i>ycf1</i>              | IRB | 131617 | <i>ycf1</i>              | IRB |
| <i>Epimedium_borealiguizhouense_GZQB</i> |   |     |        |                          |     |        |                          |     |
| 1                                        | F | 189 | 4627   | <i>trnK-UUU-rps16</i>    | LSC | 109682 | <i>rrn23</i>             | IRA |
| 2                                        | P | 189 | 4627   | <i>trnK-UUU-rps16</i>    | LSC | 136012 | <i>rrn23</i>             | IRB |
| 3                                        | F | 135 | 4681   | <i>trnK-UUU-rps16</i>    | LSC | 109736 | <i>rrn23</i>             | IRA |
| 4                                        | P | 135 | 4681   | <i>trnK-UUU-rps16</i>    | LSC | 136012 | <i>rrn23</i>             | IRB |
| 5                                        | P | 131 | 5821   | <i>trnK-UUU-rps16</i>    | LSC | 103680 | <i>trnV-GAC-rrn16</i>    | IRA |
| 6                                        | F | 131 | 5821   | <i>trnK-UUU-rps16</i>    | LSC | 142072 | <i>rrn16</i>             | IRB |
| 7                                        | F | 82  | 114085 | <i>ycf1</i>              | IRA | 114199 | <i>ycf1</i>              | IRA |
| 8                                        | P | 82  | 114085 | <i>ycf1</i>              | IRA | 131602 | <i>ycf1</i>              | IRB |
| 9                                        | P | 82  | 114199 | <i>ycf1</i>              | IRA | 131716 | <i>ycf1</i>              | IRB |
| 10                                       | F | 82  | 131602 | <i>ycf1</i>              | IRB | 131716 | <i>ycf1</i>              | IRB |
| 11                                       | P | 71  | 62230  | <i>accD-psaI</i>         | LSC | 62230  | <i>accD-psaI</i>         | LSC |
| 12                                       | F | 62  | 131622 | <i>ycf1</i>              | IRB | 131736 | <i>ycf1</i>              | IRB |
| 13                                       | P | 48  | 54757  | <i>trnV-UAC-trnM-CAU</i> | LSC | 54757  | <i>trnV-UAC-trnM-CAU</i> | LSC |
| 14                                       | F | 53  | 114083 | <i>ycf1</i>              | IRA | 114149 | <i>ycf1</i>              | IRA |
| 15                                       | P | 53  | 114083 | <i>ycf1</i>              | IRA | 131681 | <i>ycf1</i>              | IRB |
| 16                                       | P | 53  | 114149 | <i>ycf1</i>              | IRA | 131747 | <i>ycf1</i>              | IRB |
| 17                                       | F | 53  | 131681 | <i>ycf1</i>              | IRB | 131747 | <i>ycf1</i>              | IRB |
| 18                                       | P | 49  | 98095  | <i>trnL-CAA-ndhB</i>     | IRA | 98095  | <i>trnL-CAA-ndhB</i>     | IRA |
| 19                                       | F | 49  | 98095  | <i>trnL-CAA-ndhB</i>     | IRA | 147739 | <i>ndhB-trnL-CAA</i>     | IRB |
| 20                                       | P | 49  | 147739 | <i>ndhB-trnL-CAA</i>     | IRB | 147739 | <i>ndhB-trnL-CAA</i>     | IRB |
| 21                                       | P | 44  | 29955  | <i>petN-psbM</i>         | LSC | 29955  | <i>petN-psbM</i>         | LSC |

|    |   |    |        |                                         |                                         |        |                                         |     |
|----|---|----|--------|-----------------------------------------|-----------------------------------------|--------|-----------------------------------------|-----|
| 22 | F | 47 | 72262  | <i>rps12-clpP</i>                       | LSC                                     | 72307  | <i>rps12-clpP</i>                       | LSC |
| 23 | F | 50 | 74449  | <i>clpP_extron_2-<br/>clpP_extron_1</i> | <i>clpP_extron_2-<br/>clpP_extron_1</i> | 74497  | <i>clpP_extron_2-<br/>clpP_extron_1</i> | LSC |
| 24 | F | 46 | 114156 | <i>ycf1</i>                             | IRA                                     | 114204 | <i>ycf1</i>                             | IRA |
| 25 | P | 46 | 114156 | <i>ycf1</i>                             | IRA                                     | 131633 | <i>ycf1</i>                             | IRB |
| 26 | P | 46 | 114204 | <i>ycf1</i>                             | IRA                                     | 131681 | <i>ycf1</i>                             | IRB |
| 27 | F | 46 | 131633 | <i>ycf1</i>                             | IRB                                     | 131681 | <i>ycf1</i>                             | IRB |
| 28 | F | 37 | 92163  | <i>ycf2</i>                             | IRA                                     | 92220  | <i>ycf2</i>                             | IRA |
| 29 | P | 37 | 92163  | <i>ycf2</i>                             | IRA                                     | 153626 | <i>ycf2</i>                             | IRB |
| 30 | P | 37 | 92220  | <i>ycf2</i>                             | IRA                                     | 153683 | <i>ycf2</i>                             | IRB |
| 31 | F | 37 | 153626 | <i>ycf2</i>                             | IRB                                     | 153683 | <i>ycf2</i>                             | IRB |
| 32 | F | 40 | 131694 | <i>ycf1</i>                             | IRB                                     | 131760 | <i>ycf1</i>                             | IRB |
| 33 | P | 36 | 36446  | <i>psbC-trnS-UGA</i>                    | LSC                                     | 36494  | <i>psbC-trnS-UGA</i>                    | LSC |
| 34 | P | 35 | 5917   | <i>trnK-UUU-rps16</i>                   | LSC                                     | 103680 | <i>trnV-GAC-rrn16</i>                   | IRA |
| 35 | F | 35 | 5917   | <i>trnK-UUU-rps16</i>                   | LSC                                     | 142168 | <i>rrn16-trnV-GAC</i>                   | IRB |
| 36 | P | 35 | 65754  | <i>petA-psbJ</i>                        | LSC                                     | 65796  | <i>petA-psbJ</i>                        | LSC |
| 37 | P | 43 | 49674  | <i>trnL-UAA-trnF-GAA</i>                | LSC                                     | 49674  | <i>trnL-UAA-trnF-GAA</i>                | LSC |
| 38 | F | 43 | 114001 | <i>ycf1</i>                             | IRA                                     | 114013 | <i>ycf1</i>                             | IRA |
| 39 | P | 43 | 114001 | <i>ycf1</i>                             | IRA                                     | 131827 | <i>ycf1</i>                             | IRB |
| 40 | P | 43 | 114013 | <i>ycf1</i>                             | IRA                                     | 131839 | <i>ycf1</i>                             | IRB |
| 41 | F | 43 | 131827 | <i>ycf1</i>                             | IRB                                     | 131839 | <i>ycf1</i>                             | IRB |
| 42 | F | 33 | 131646 | <i>ycf1</i>                             | IRB                                     | 131694 | <i>ycf1</i>                             | IRB |
| 43 | F | 39 | 44938  | <i>ycf3_extron_2-<br/>ycf3_extron_1</i> | LSC                                     | 102112 | <i>rps12-trnV-GAC</i>                   | IRA |
| 44 | P | 39 | 44938  | <i>ycf3_extron_2-<br/>ycf3_extron_1</i> | LSC                                     | 143732 | <i>trnV-GAC-rps12</i>                   | IRB |
| 45 | P | 36 | 8626   | <i>psbI-trnS-GCU</i>                    | LSC                                     | 46676  | <i>trnS-GGA</i>                         | LSC |
| 46 | F | 32 | 5497   | <i>trnK-UUU-rps16</i>                   | LSC                                     | 5647   | <i>trnK-UUU-rps16</i>                   | LSC |
| 47 | P | 32 | 62141  | <i>accD-psaI</i>                        | LSC                                     | 62180  | <i>accD-psaI</i>                        | LSC |
| 48 | F | 40 | 5534   | <i>trnK-UUU-rps16</i>                   | LSC                                     | 5679   | <i>trnK-UUU-rps16</i>                   | LSC |
| 49 | F | 40 | 60681  | <i>accD</i>                             | LSC                                     | 60756  | <i>accD</i>                             | LSC |

*Epimedium\_chlorandrum*\_SCM

P

|    |   |     |        |                                    |     |        |                          |     |
|----|---|-----|--------|------------------------------------|-----|--------|--------------------------|-----|
| 1  | P | 131 | 5832   | <i>trnK-UUU-rps16</i>              | LSC | 103638 | <i>trnV-GAC-rrn16</i>    | IRA |
| 2  | F | 131 | 5832   | <i>trnK-UUU-rps16</i>              | LSC | 141108 | <i>rrn16</i>             | IRB |
| 3  | F | 107 | 4635   | <i>trnK-UUU-rps16</i>              | LSC | 109640 | <i>rrn23</i>             | IRA |
| 4  | P | 107 | 4635   | <i>trnK-UUU-rps16</i>              | LSC | 135130 | <i>rrn23</i>             | IRB |
| 5  | F | 82  | 114004 | <i>ycf1</i>                        | IRA | 114118 | <i>ycf1</i>              | IRA |
| 6  | P | 82  | 114004 | <i>ycf1</i>                        | IRA | 130677 | <i>ycf1</i>              | IRB |
| 7  | F | 40  | 130769 | <i>ycf1</i>                        | IRB | 130835 | <i>ycf1</i>              | IRB |
| 8  | P | 35  | 5928   | <i>trnK-UUU-rps16</i>              | LSC | 103638 | <i>trnV-GAC-rrn16</i>    | IRA |
| 9  | F | 43  | 113920 | <i>ycf1</i>                        | IRA | 113932 | <i>ycf1</i>              | IRA |
| 10 | P | 43  | 113932 | <i>ycf1</i>                        | IRA | 130914 | <i>ycf1</i>              | IRB |
| 11 | P | 53  | 114068 | <i>ycf1</i>                        | IRA | 130822 | <i>ycf1</i>              | IRB |
| 12 | F | 43  | 130902 | <i>ycf1</i>                        | IRB | 130914 | <i>ycf1</i>              | IRB |
| 13 | P | 48  | 54771  | <i>trnV-UAC-trnM-CAU</i>           | LSC | 54771  | <i>trnV-UAC-trnM-CAU</i> | LSC |
| 14 | P | 46  | 114123 | <i>ycf1</i>                        | IRA | 130756 | <i>ycf1</i>              | IRB |
| 15 | F | 46  | 130708 | <i>ycf1</i>                        | IRB | 130756 | <i>ycf1</i>              | IRB |
| 16 | F | 35  | 5928   | <i>trnK-UUU-rps16</i>              | LSC | 141204 | <i>rrn16-trnV-GAC</i>    | IRB |
| 17 | P | 39  | 44954  | <i>ycf3_extron_2-ycf3_extron_1</i> | LSC | 142759 | <i>trnV-GAC-rps12</i>    | IRB |
| 18 | P | 44  | 29969  | <i>petN-psbM</i>                   | LSC | 29969  | <i>petN-psbM</i>         | LSC |
| 19 | F | 47  | 72295  | <i>rps12-clpP</i>                  | LSC | 72340  | <i>rps12-clpP</i>        | LSC |
| 20 | F | 40  | 60715  | <i>accD</i>                        | LSC | 60790  | <i>accD</i>              | LSC |
| 21 | F | 77  | 4745   | <i>trnK-UUU-rps16</i>              | LSC | 109752 | <i>rrn23</i>             | IRA |
| 22 | F | 49  | 4773   | <i>trnK-UUU-rps16</i>              | LSC | 109780 | <i>rrn23</i>             | IRA |
| 23 | P | 49  | 4773   | <i>trnK-UUU-rps16</i>              | LSC | 135048 | <i>rrn23</i>             | IRB |
| 24 | P | 35  | 65787  | <i>petA-psbJ</i>                   | LSC | 65829  | <i>petA-psbJ</i>         | LSC |
| 25 | P | 43  | 49689  | <i>trnL-UAA-trnF-GAA</i>           | LSC | 49689  | <i>trnL-UAA-trnF-GAA</i> | LSC |
| 26 | P | 43  | 113920 | <i>ycf1</i>                        | IRA | 130902 | <i>ycf1</i>              | IRB |
| 27 | F | 33  | 130721 | <i>ycf1</i>                        | IRB | 130769 | <i>ycf1</i>              | IRB |
| 28 | P | 49  | 98053  | <i>trnL-CAA-ndhB</i>               | IRA | 98053  | <i>trnL-CAA-ndhB</i>     | IRA |
| 29 | F | 49  | 98053  | <i>trnL-CAA-ndhB</i>               | IRA | 146775 | <i>ndhB-trnL-CAA</i>     | IRB |

|                                        |   |     |        |                                         |     |        |                                         |     |
|----------------------------------------|---|-----|--------|-----------------------------------------|-----|--------|-----------------------------------------|-----|
| 30                                     | P | 49  | 146775 | <i>ndhB-trnL-CAA</i>                    | IRB | 146775 | <i>ndhB-trnL-CAA</i>                    | IRB |
| 31                                     | P | 34  | 27922  | <i>rpoB-trnC-GCA</i>                    | LSC | 28634  | <i>trnC-GCA-petN</i>                    | LSC |
| 32                                     | P | 36  | 8645   | <i>psbI-trnS-GCU</i>                    | LSC | 46691  | <i>trnS-GGA</i>                         | LSC |
| 33                                     | P | 77  | 4745   | <i>trnK-UUU-rps16</i>                   | LSC | 135048 | <i>rrn23</i>                            | IRB |
| 34                                     | P | 82  | 114118 | <i>ycf1</i>                             | IRA | 130791 | <i>ycf1</i>                             | IRB |
| 35                                     | F | 82  | 130677 | <i>ycf1</i>                             | IRB | 130791 | <i>ycf1</i>                             | IRB |
| 36                                     | F | 53  | 130756 | <i>ycf1</i>                             | IRB | 130822 | <i>ycf1</i>                             | IRB |
| 37                                     | P | 53  | 4689   | <i>trnK-UUU-rps16</i>                   | LSC | 135130 | <i>rrn23</i>                            | IRB |
| 38                                     | F | 50  | 74478  | <i>clpP_extron_2-<br/>clpP_extron_1</i> | LSC | 74526  | <i>clpP_extron_2-<br/>clpP_extron_1</i> | LSC |
| 39                                     | F | 46  | 114075 | <i>ycf1</i>                             | IRA | 114123 | <i>ycf1</i>                             | IRA |
| 40                                     | P | 46  | 114075 | <i>ycf1</i>                             | IRA | 130708 | <i>ycf1</i>                             | IRB |
| 41                                     | F | 32  | 5508   | <i>trnK-UUU-rps16</i>                   | LSC | 5658   | <i>trnK-UUU-rps16</i>                   | LSC |
| 42                                     | F | 39  | 44954  | <i>ycf3_extron_2-<br/>ycf3_extron_1</i> | LSC | 102079 | <i>rps12-trnV-GAC</i>                   | IRA |
| 43                                     | F | 62  | 130697 | <i>ycf1</i>                             | IRB | 130811 | <i>ycf1</i>                             | IRB |
| 44                                     | F | 53  | 4689   | <i>trnK-UUU-rps16</i>                   | LSC | 109694 | <i>rrn23</i>                            | IRA |
| 45                                     | P | 71  | 62265  | <i>accD-psaI</i>                        | LSC | 62265  | <i>accD-psaI</i>                        | LSC |
| 46                                     | P | 78  | 5885   | <i>trnK-UUU-rps16</i>                   | LSC | 103638 | <i>trnV-GAC-rrn16</i>                   | IRA |
| 47                                     | P | 53  | 114002 | <i>ycf1</i>                             | IRA | 130756 | <i>ycf1</i>                             | IRB |
| 48                                     | F | 78  | 5885   | <i>trnK-UUU-rps16</i>                   | LSC | 141161 | <i>rrn16</i>                            | IRB |
| 49                                     | F | 53  | 114002 | <i>ycf1</i>                             | IRA | 114068 | <i>ycf1</i>                             | IRA |
| <i>Epimedium_pseudowushanense_GZJH</i> |   |     |        |                                         |     |        |                                         |     |
| 1                                      | P | 131 | 5839   | <i>trnK-UUU-rps16</i>                   | LSC | 103507 | <i>trnV-GAC-rrn16</i>                   | IRA |
| 2                                      | F | 131 | 5839   | <i>trnK-UUU-rps16</i>                   | LSC | 141887 | <i>rrn16</i>                            | IRB |
| 3                                      | F | 107 | 4641   | <i>trnK-UUU-rps16</i>                   | LSC | 109509 | <i>rrn23</i>                            | IRA |
| 4                                      | P | 107 | 4641   | <i>trnK-UUU-rps16</i>                   | LSC | 135909 | <i>rrn23</i>                            | IRB |
| 5                                      | F | 82  | 113912 | <i>ycf1</i>                             | IRA | 114026 | <i>ycf1</i>                             | IRA |
| 6                                      | P | 82  | 113912 | <i>ycf1</i>                             | IRA | 131417 | <i>ycf1</i>                             | IRB |
| 7                                      | P | 82  | 114026 | <i>ycf1</i>                             | IRA | 131531 | <i>ycf1</i>                             | IRB |
| 8                                      | F | 82  | 131417 | <i>ycf1</i>                             | IRB | 131531 | <i>ycf1</i>                             | IRB |
| 9                                      | P | 71  | 62088  | <i>accD-psaI</i>                        | LSC | 62088  | <i>accD-psaI</i>                        | LSC |

|    |   |    |        |                                         |     |        |                                         |     |
|----|---|----|--------|-----------------------------------------|-----|--------|-----------------------------------------|-----|
| 10 | F | 77 | 4751   | <i>trnK-UUU-rps16</i>                   | LSC | 109621 | <i>rrn23</i>                            | IRA |
| 11 | P | 77 | 4751   | <i>trnK-UUU-rps16</i>                   | LSC | 135827 | <i>rrn23</i>                            | IRB |
| 12 | F | 69 | 5509   | <i>trnK-UUU-rps16</i>                   | LSC | 5660   | <i>trnK-UUU-rps16</i>                   | LSC |
| 13 | F | 62 | 131437 | <i>ycf1</i>                             | IRB | 131551 | <i>ycf1</i>                             | IRB |
| 14 | F | 53 | 4695   | <i>trnK-UUU-rps16</i>                   | LSC | 109563 | <i>rrn23</i>                            | IRA |
| 15 | P | 53 | 4695   | <i>trnK-UUU-rps16</i>                   | LSC | 135909 | <i>rrn23</i>                            | IRB |
| 16 | P | 48 | 54645  | <i>trnV-UAC-trnM-CAU</i>                | LSC | 54645  | <i>trnV-UAC-trnM-CAU</i>                | LSC |
| 17 | F | 53 | 113910 | <i>ycf1</i>                             | IRA | 113976 | <i>ycf1</i>                             | IRA |
| 18 | P | 53 | 113910 | <i>ycf1</i>                             | IRA | 131496 | <i>ycf1</i>                             | IRB |
| 19 | P | 53 | 113976 | <i>ycf1</i>                             | IRA | 131562 | <i>ycf1</i>                             | IRB |
| 20 | F | 53 | 131496 | <i>ycf1</i>                             | IRB | 131562 | <i>ycf1</i>                             | IRB |
| 21 | F | 49 | 4779   | <i>trnK-UUU-rps16</i>                   | LSC | 109649 | <i>rrn23</i>                            | IRA |
| 22 | P | 49 | 4779   | <i>trnK-UUU-rps16</i>                   | LSC | 135827 | <i>rrn23</i>                            | IRB |
| 23 | P | 49 | 97931  | <i>trnL-CAA-ndhB</i>                    | IRA | 97931  | <i>trnL-CAA-ndhB</i>                    | IRA |
| 24 | F | 49 | 97931  | <i>trnL-CAA-ndhB</i>                    | IRA | 147545 | <i>ndhB-trnL-CAA</i>                    | IRB |
| 25 | P | 49 | 147545 | <i>ndhB-trnL-CAA</i>                    | IRB | 147545 | <i>ndhB-trnL-CAA</i>                    | IRB |
| 26 | P | 44 | 29873  | <i>petN-psbM</i>                        | LSC | 29873  | <i>petN-psbM</i>                        | LSC |
| 27 | F | 47 | 72099  | <i>rps12-clpP</i>                       | LSC | 72144  | <i>rps12-clpP</i>                       | LSC |
| 28 | F | 50 | 74291  | <i>clpP_extron_2-<br/>clpP_extron_1</i> | LSC | 74339  | <i>clpP_extron_2-<br/>clpP_extron_1</i> | LSC |
| 29 | F | 46 | 113983 | <i>ycf1</i>                             | IRA | 114031 | <i>ycf1</i>                             | IRA |
| 30 | P | 46 | 113983 | <i>ycf1</i>                             | IRA | 131448 | <i>ycf1</i>                             | IRB |
| 31 | P | 46 | 114031 | <i>ycf1</i>                             | IRA | 131496 | <i>ycf1</i>                             | IRB |
| 32 | F | 46 | 131448 | <i>ycf1</i>                             | IRB | 131496 | <i>ycf1</i>                             | IRB |
| 33 | F | 37 | 92009  | <i>ycf2</i>                             | IRA | 92066  | <i>ycf2</i>                             | IRA |
| 34 | P | 37 | 92009  | <i>ycf2</i>                             | IRA | 153422 | <i>ycf2</i>                             | IRB |
| 35 | P | 37 | 92066  | <i>ycf2</i>                             | IRA | 153479 | <i>ycf2</i>                             | IRB |
| 36 | F | 37 | 153422 | <i>ycf2</i>                             | IRB | 153479 | <i>ycf2</i>                             | IRB |
| 37 | F | 40 | 131509 | <i>ycf1</i>                             | IRB | 131575 | <i>ycf1</i>                             | IRB |
| 38 | F | 43 | 5568   | <i>trnK-UUU-rps16</i>                   | LSC | 5729   | <i>trnK-UUU-rps16</i>                   | LSC |
| 39 | P | 35 | 5935   | <i>trnK-UUU-rps16</i>                   | LSC | 103507 | <i>trnV-GAC-rrn16</i>                   | IRA |
| 40 | F | 35 | 5935   | <i>trnK-UUU-rps16</i>                   | LSC | 141983 | <i>rrn16-trnV-GAC</i>                   | IRB |



|                                 |   |     |        |                                    |     |        |                          |     |
|---------------------------------|---|-----|--------|------------------------------------|-----|--------|--------------------------|-----|
| 41                              | P | 35  | 65616  | <i>petA-psbJ</i>                   | LSC | 65658  | <i>petA-psbJ</i>         | LSC |
| 42                              | P | 43  | 49580  | <i>trnL-UAA-trnF-GAA</i>           | LSC | 49580  | <i>trnL-UAA-trnF-GAA</i> | LSC |
| 43                              | F | 43  | 113828 | <i>ycf1</i>                        | IRA | 113840 | <i>ycf1</i>              | IRA |
| 44                              | P | 43  | 113828 | <i>ycf1</i>                        | IRA | 131642 | <i>ycf1</i>              | IRB |
| 45                              | P | 43  | 113840 | <i>ycf1</i>                        | IRA | 131654 | <i>ycf1</i>              | IRB |
| 46                              | F | 43  | 131642 | <i>ycf1</i>                        | IRB | 131654 | <i>ycf1</i>              | IRB |
| 47                              | F | 33  | 131461 | <i>ycf1</i>                        | IRB | 131509 | <i>ycf1</i>              | IRB |
| 48                              | F | 39  | 44839  | <i>ycf3_extron_2-ycf3_extron_1</i> | LSC | 101948 | <i>rps12-trnV-GAC</i>    | IRA |
| 49                              | P | 39  | 44839  | <i>ycf3_extron_2-ycf3_extron_1</i> | LSC | 143538 | <i>trnV-GAC-rps12</i>    | IRB |
| <i>Epimedium_mikinorii_HBES</i> |   |     |        |                                    |     |        |                          |     |
| 1                               | P | 131 | 5837   | <i>trnK-UUU-rps16</i>              | LSC | 103414 | <i>trnV-GAC-rrn16</i>    | IRA |
| 2                               | F | 131 | 5837   | <i>trnK-UUU-rps16</i>              | LSC | 141798 | <i>rrn16</i>             | IRB |
| 3                               | F | 107 | 4626   | <i>trnK-UUU-rps16</i>              | LSC | 109416 | <i>rrn23</i>             | IRA |
| 4                               | P | 107 | 4626   | <i>trnK-UUU-rps16</i>              | LSC | 135820 | <i>rrn23</i>             | IRB |
| 5                               | F | 82  | 113819 | <i>ycf1</i>                        | IRA | 113933 | <i>ycf1</i>              | IRA |
| 6                               | P | 82  | 113819 | <i>ycf1</i>                        | IRA | 131328 | <i>ycf1</i>              | IRB |
| 7                               | P | 82  | 113933 | <i>ycf1</i>                        | IRA | 131442 | <i>ycf1</i>              | IRB |
| 8                               | F | 82  | 131328 | <i>ycf1</i>                        | IRB | 131442 | <i>ycf1</i>              | IRB |
| 9                               | P | 71  | 62153  | <i>accD-psaI</i>                   | LSC | 62153  | <i>accD-psaI</i>         | LSC |
| 10                              | F | 72  | 4761   | <i>trnK-UUU-rps16</i>              | LSC | 109533 | <i>rrn23</i>             | IRA |
| 11                              | P | 72  | 4761   | <i>trnK-UUU-rps16</i>              | LSC | 135738 | <i>rrn23</i>             | IRB |
| 12                              | F | 62  | 131348 | <i>ycf1</i>                        | IRB | 131462 | <i>ycf1</i>              | IRB |
| 13                              | F | 53  | 4680   | <i>trnK-UUU-rps16</i>              | LSC | 109470 | <i>rrn23</i>             | IRA |
| 14                              | P | 53  | 4680   | <i>trnK-UUU-rps16</i>              | LSC | 135820 | <i>rrn23</i>             | IRB |
| 15                              | P | 48  | 54684  | <i>trnV-UAC-trnM-CAU</i>           | LSC | 54684  | <i>trnV-UAC-trnM-CAU</i> | LSC |
| 16                              | F | 53  | 113817 | <i>ycf1</i>                        | IRA | 113883 | <i>ycf1</i>              | IRA |
| 17                              | P | 53  | 113817 | <i>ycf1</i>                        | IRA | 131407 | <i>ycf1</i>              | IRB |
| 18                              | P | 53  | 113883 | <i>ycf1</i>                        | IRA | 131473 | <i>ycf1</i>              | IRB |
| 19                              | F | 53  | 131407 | <i>ycf1</i>                        | IRB | 131473 | <i>ycf1</i>              | IRB |
| 20                              | F | 49  | 4784   | <i>trnK-UUU-rps16</i>              | LSC | 109556 | <i>rrn23</i>             | IRA |

|    |   |    |        |                                         |     |        |                                         |     |
|----|---|----|--------|-----------------------------------------|-----|--------|-----------------------------------------|-----|
| 21 | P | 49 | 4784   | <i>trnK-UUU-rps16</i>                   | LSC | 135738 | <i>rrn23</i>                            | IRB |
| 22 | P | 49 | 97838  | <i>trnL-CAA-ndhB</i>                    | IRA | 97838  | <i>trnL-CAA-ndhB</i>                    | IRA |
| 23 | F | 49 | 97838  | <i>trnL-CAA-ndhB</i>                    | IRA | 147456 | <i>ndhB-trnL-CAA</i>                    | IRB |
| 24 | P | 49 | 147456 | <i>ndhB-trnL-CAA</i>                    | IRB | 147456 | <i>ndhB-trnL-CAA</i>                    | IRB |
| 25 | P | 44 | 29980  | <i>petN-psbM</i>                        | LSC | 29980  | <i>petN-psbM</i>                        | LSC |
| 26 | F | 47 | 72109  | <i>rps12-clpP</i>                       | LSC | 72154  | <i>rps12-clpP</i>                       | LSC |
| 27 | F | 50 | 74292  | <i>clpP_extron_2-<br/>clpP_extron_1</i> | LSC | 74340  | <i>clpP_extron_2-<br/>clpP_extron_1</i> | LSC |
| 28 | F | 46 | 113890 | <i>ycf1</i>                             | IRA | 113938 | <i>ycf1</i>                             | IRA |
| 29 | P | 46 | 113890 | <i>ycf1</i>                             | IRA | 131359 | <i>ycf1</i>                             | IRB |
| 30 | P | 46 | 113938 | <i>ycf1</i>                             | IRA | 131407 | <i>ycf1</i>                             | IRB |
| 31 | F | 46 | 131359 | <i>ycf1</i>                             | IRB | 131407 | <i>ycf1</i>                             | IRB |
| 32 | F | 40 | 131420 | <i>ycf1</i>                             | IRB | 131486 | <i>ycf1</i>                             | IRB |
| 33 | P | 36 | 36454  | <i>psbC-trnS-UGA</i>                    | LSC | 36502  | <i>psbC-trnS-UGA</i>                    | LSC |
| 34 | P | 35 | 5933   | <i>trnK-UUU-rps16</i>                   | LSC | 103414 | <i>trnV-GAC-rrn16</i>                   | IRA |
| 35 | F | 35 | 5933   | <i>trnK-UUU-rps16</i>                   | LSC | 141894 | <i>rrn16-trnV-GAC</i>                   | IRB |
| 36 | P | 35 | 65674  | <i>petA-psbJ</i>                        | LSC | 65716  | <i>petA-psbJ</i>                        | LSC |
| 37 | P | 43 | 49632  | <i>trnL-UAA-trnF-GAA</i>                | LSC | 49632  | <i>trnL-UAA-trnF-GAA</i>                | LSC |
| 38 | F | 43 | 113735 | <i>ycf1</i>                             | IRA | 113747 | <i>ycf1</i>                             | IRA |
| 39 | P | 43 | 113735 | <i>ycf1</i>                             | IRA | 131553 | <i>ycf1</i>                             | IRB |
| 40 | P | 43 | 113747 | <i>ycf1</i>                             | IRA | 131565 | <i>ycf1</i>                             | IRB |
| 41 | F | 43 | 131553 | <i>ycf1</i>                             | IRB | 131565 | <i>ycf1</i>                             | IRB |
| 42 | F | 33 | 131372 | <i>ycf1</i>                             | IRB | 131420 | <i>ycf1</i>                             | IRB |
| 43 | F | 39 | 44898  | <i>ycf3_extron_2-<br/>ycf3_extron_1</i> | LSC | 101855 | <i>rps12-trnV-GAC</i>                   | IRA |
| 44 | P | 39 | 44898  | <i>ycf3_extron_2-<br/>ycf3_extron_1</i> | LSC | 143449 | <i>trnV-GAC-rps12</i>                   | IRB |
| 45 | P | 36 | 8656   | <i>psbI-trnS-GCU</i>                    | LSC | 46634  | <i>trnS-GGA</i>                         | LSC |
| 46 | F | 32 | 5513   | <i>trnK-UUU-rps16</i>                   | LSC | 5663   | <i>trnK-UUU-rps16</i>                   | LSC |
| 47 | F | 40 | 60613  | <i>accD</i>                             | LSC | 60688  | <i>accD</i>                             | LSC |
| 48 | P | 34 | 27932  | <i>rpoB-trnC-GCA</i>                    | LSC | 28645  | <i>trnC-GCA-petN</i>                    | LSC |

|                                 |   |     |        |                                         |     |        |                                         |     |
|---------------------------------|---|-----|--------|-----------------------------------------|-----|--------|-----------------------------------------|-----|
| 49                              | F | 33  | 74309  | <i>clpP_extron_2-<br/>clpP_extron_1</i> | LSC | 74357  | <i>clpP_extron_2-<br/>clpP_extron_1</i> | LSC |
| <i>Epimedium_wushanense_HBX</i> |   |     |        |                                         |     |        |                                         |     |
| S_2                             |   |     |        |                                         |     |        |                                         |     |
| 1                               | P | 131 | 5819   | <i>trnK-UUU-rps16</i>                   | LSC | 103640 | <i>trnV-GAC-rrn16</i>                   | IRA |
| 2                               | F | 131 | 5819   | <i>trnK-UUU-rps16</i>                   | LSC | 142040 | <i>rrn16</i>                            | IRB |
| 3                               | F | 107 | 4625   | <i>trnK-UUU-rps16</i>                   | LSC | 109642 | <i>rrn23</i>                            | IRA |
| 4                               | P | 107 | 4625   | <i>trnK-UUU-rps16</i>                   | LSC | 136062 | <i>rrn23</i>                            | IRB |
| 5                               | P | 71  | 62219  | <i>accD-psaI</i>                        | LSC | 62219  | <i>accD-psaI</i>                        | LSC |
| 6                               | F | 77  | 4735   | <i>trnK-UUU-rps16</i>                   | LSC | 109754 | <i>rrn23</i>                            | IRA |
| 7                               | P | 77  | 4735   | <i>trnK-UUU-rps16</i>                   | LSC | 135980 | <i>rrn23</i>                            | IRB |
| 8                               | F | 77  | 114050 | <i>ycf1</i>                             | IRA | 114164 | <i>ycf1</i>                             | IRA |
| 9                               | P | 77  | 114050 | <i>ycf1</i>                             | IRA | 131570 | <i>ycf1</i>                             | IRB |
| 10                              | P | 77  | 114164 | <i>ycf1</i>                             | IRA | 131684 | <i>ycf1</i>                             | IRB |
| 11                              | F | 77  | 131570 | <i>ycf1</i>                             | IRB | 131684 | <i>ycf1</i>                             | IRB |
| 12                              | F | 62  | 131590 | <i>ycf1</i>                             | IRB | 131704 | <i>ycf1</i>                             | IRB |
| 13                              | F | 53  | 4679   | <i>trnK-UUU-rps16</i>                   | LSC | 109696 | <i>rrn23</i>                            | IRA |
| 14                              | P | 53  | 4679   | <i>trnK-UUU-rps16</i>                   | LSC | 136062 | <i>rrn23</i>                            | IRB |
| 15                              | P | 48  | 54746  | <i>trnV-UAC-trnM-CAU</i>                | LSC | 54746  | <i>trnV-UAC-trnM-CAU</i>                | LSC |
| 16                              | F | 53  | 114043 | <i>ycf1</i>                             | IRA | 114109 | <i>ycf1</i>                             | IRA |
| 17                              | P | 53  | 114043 | <i>ycf1</i>                             | IRA | 131649 | <i>ycf1</i>                             | IRB |
| 18                              | P | 53  | 114109 | <i>ycf1</i>                             | IRA | 131715 | <i>ycf1</i>                             | IRB |
| 19                              | F | 53  | 131649 | <i>ycf1</i>                             | IRB | 131715 | <i>ycf1</i>                             | IRB |
| 20                              | F | 49  | 4763   | <i>trnK-UUU-rps16</i>                   | LSC | 109782 | <i>rrn23</i>                            | IRA |
| 21                              | P | 49  | 4763   | <i>trnK-UUU-rps16</i>                   | LSC | 135980 | <i>rrn23</i>                            | IRB |
| 22                              | P | 49  | 98064  | <i>trnL-CAA-ndhB</i>                    | IRA | 98064  | <i>trnL-CAA-ndhB</i>                    | IRA |
| 23                              | F | 49  | 98064  | <i>trnL-CAA-ndhB</i>                    | IRA | 147698 | <i>ndhB-trnL-CAA</i>                    | IRB |
| 24                              | P | 49  | 147698 | <i>ndhB-trnL-CAA</i>                    | IRB | 147698 | <i>ndhB-trnL-CAA</i>                    | IRB |
| 25                              | P | 44  | 29945  | <i>petN-psbM</i>                        | LSC | 29945  | <i>petN-psbM</i>                        | LSC |
| 26                              | F | 47  | 72231  | <i>rps12-clpP</i>                       | LSC | 72276  | <i>rps12-clpP</i>                       | LSC |
| 27                              | F | 50  | 74413  | <i>clpP_extron_2-<br/>clpP_extron_1</i> | LSC | 74461  | <i>clpP_extron_2-<br/>clpP_extron_1</i> | LSC |

|                                 |   |     |        |                                    |     |        |                          |     |
|---------------------------------|---|-----|--------|------------------------------------|-----|--------|--------------------------|-----|
| 28                              | F | 46  | 114116 | <i>ycf1</i>                        | IRA | 114164 | <i>ycf1</i>              | IRA |
| 29                              | P | 46  | 114116 | <i>ycf1</i>                        | IRA | 131601 | <i>ycf1</i>              | IRB |
| 30                              | P | 46  | 114164 | <i>ycf1</i>                        | IRA | 131649 | <i>ycf1</i>              | IRB |
| 31                              | F | 46  | 131601 | <i>ycf1</i>                        | IRB | 131649 | <i>ycf1</i>              | IRB |
| 32                              | F | 37  | 92138  | <i>ycf2</i>                        | IRA | 92195  | <i>ycf2</i>              | IRA |
| 33                              | P | 37  | 92138  | <i>ycf2</i>                        | IRA | 153579 | <i>ycf2</i>              | IRB |
| 34                              | P | 37  | 92195  | <i>ycf2</i>                        | IRA | 153636 | <i>ycf2</i>              | IRB |
| 35                              | F | 37  | 153579 | <i>ycf2</i>                        | IRB | 153636 | <i>ycf2</i>              | IRB |
| 36                              | F | 40  | 131662 | <i>ycf1</i>                        | IRB | 131728 | <i>ycf1</i>              | IRB |
| 37                              | P | 35  | 5915   | <i>trnK-UUU-rps16</i>              | LSC | 103640 | <i>trnV-GAC-rrn16</i>    | IRA |
| 38                              | F | 35  | 5915   | <i>trnK-UUU-rps16</i>              | LSC | 142136 | <i>rrn16-trnV-GAC</i>    | IRB |
| 39                              | P | 35  | 65742  | <i>petA-psbJ</i>                   | LSC | 65784  | <i>petA-psbJ</i>         | LSC |
| 40                              | P | 43  | 49681  | <i>trnL-UAA-trnF-GAA</i>           | LSC | 49681  | <i>trnL-UAA-trnF-GAA</i> | LSC |
| 41                              | F | 43  | 113961 | <i>ycf1</i>                        | IRA | 113973 | <i>ycf1</i>              | IRA |
| 42                              | P | 43  | 113961 | <i>ycf1</i>                        | IRA | 131795 | <i>ycf1</i>              | IRB |
| 43                              | P | 43  | 113973 | <i>ycf1</i>                        | IRA | 131807 | <i>ycf1</i>              | IRB |
| 44                              | F | 43  | 131795 | <i>ycf1</i>                        | IRB | 131807 | <i>ycf1</i>              | IRB |
| 45                              | P | 33  | 36450  | <i>psbC-trnS-UGA</i>               | LSC | 36495  | <i>psbC-trnS-UGA</i>     | LSC |
| 46                              | F | 33  | 131614 | <i>ycf1</i>                        | IRB | 131662 | <i>ycf1</i>              | IRB |
| 47                              | F | 39  | 44948  | <i>ycf3_extron_2-ycf3_extron_1</i> | LSC | 102081 | <i>rps12-trnV-GAC</i>    | IRA |
| 48                              | P | 39  | 44948  | <i>ycf3_extron_2-ycf3_extron_1</i> | LSC | 143691 | <i>trnV-GAC-rps12</i>    | IRB |
| 49                              | P | 36  | 8634   | <i>psbI-trnS-GCU</i>               | LSC | 46681  | <i>trnS-GGA</i>          | LSC |
| <i>Epimedium_mikinorii_GZLS</i> |   |     |        |                                    |     |        |                          |     |
| 1                               | P | 131 | 5828   | <i>trnK-UUU-rps16</i>              | LSC | 103584 | <i>trnV-GAC-rrn16</i>    | IRA |
| 2                               | F | 131 | 5828   | <i>trnK-UUU-rps16</i>              | LSC | 141727 | <i>rrn16</i>             | IRB |
| 3                               | F | 107 | 4637   | <i>trnK-UUU-rps16</i>              | LSC | 109586 | <i>rrn23</i>             | IRA |
| 4                               | P | 107 | 4637   | <i>trnK-UUU-rps16</i>              | LSC | 135749 | <i>rrn23</i>             | IRB |
| 5                               | F | 82  | 113989 | <i>ycf1</i>                        | IRA | 114103 | <i>ycf1</i>              | IRA |
| 6                               | P | 82  | 113989 | <i>ycf1</i>                        | IRA | 131257 | <i>ycf1</i>              | IRB |
| 7                               | P | 82  | 114103 | <i>ycf1</i>                        | IRA | 131371 | <i>ycf1</i>              | IRB |

|    |   |    |        |                                         |     |        |                                         |     |
|----|---|----|--------|-----------------------------------------|-----|--------|-----------------------------------------|-----|
| 8  | F | 82 | 131257 | <i>ycf1</i>                             | IRB | 131371 | <i>ycf1</i>                             | IRB |
| 9  | P | 71 | 62158  | <i>accD-psaI</i>                        | LSC | 62158  | <i>accD-psaI</i>                        | LSC |
| 10 | F | 77 | 4747   | <i>trnK-UUU-rps16</i>                   | LSC | 109698 | <i>rrn23</i>                            | IRA |
| 11 | P | 77 | 4747   | <i>trnK-UUU-rps16</i>                   | LSC | 135667 | <i>rrn23</i>                            | IRB |
| 12 | F | 62 | 131277 | <i>ycf1</i>                             | IRB | 131391 | <i>ycf1</i>                             | IRB |
| 13 | F | 53 | 4691   | <i>trnK-UUU-rps16</i>                   | LSC | 109640 | <i>rrn23</i>                            | IRA |
| 14 | P | 53 | 4691   | <i>trnK-UUU-rps16</i>                   | LSC | 135749 | <i>rrn23</i>                            | IRB |
| 15 | P | 48 | 54721  | <i>trnV-UAC-trnM-CAU</i>                | LSC | 54721  | <i>trnV-UAC-trnM-CAU</i>                | LSC |
| 16 | F | 53 | 113987 | <i>ycf1</i>                             | IRA | 114053 | <i>ycf1</i>                             | IRA |
| 17 | P | 53 | 113987 | <i>ycf1</i>                             | IRA | 131336 | <i>ycf1</i>                             | IRB |
| 18 | P | 53 | 114053 | <i>ycf1</i>                             | IRA | 131402 | <i>ycf1</i>                             | IRB |
| 19 | F | 53 | 131336 | <i>ycf1</i>                             | IRB | 131402 | <i>ycf1</i>                             | IRB |
| 20 | F | 49 | 4775   | <i>trnK-UUU-rps16</i>                   | LSC | 109726 | <i>rrn23</i>                            | IRA |
| 21 | P | 49 | 4775   | <i>trnK-UUU-rps16</i>                   | LSC | 135667 | <i>rrn23</i>                            | IRB |
| 22 | P | 49 | 98008  | <i>trnL-CAA-ndhB</i>                    | IRA | 98008  | <i>trnL-CAA-ndhB</i>                    | IRA |
| 23 | F | 49 | 98008  | <i>trnL-CAA-ndhB</i>                    | IRA | 147385 | <i>ndhB-trnL-CAA</i>                    | IRB |
| 24 | P | 49 | 147385 | <i>ndhB-trnL-CAA</i>                    | IRB | 147385 | <i>ndhB-trnL-CAA</i>                    | IRB |
| 25 | P | 44 | 29970  | <i>petN-psbM</i>                        | LSC | 29970  | <i>petN-psbM</i>                        | LSC |
| 26 | F | 47 | 72178  | <i>rps12-clpP</i>                       | LSC | 72223  | <i>rps12-clpP</i>                       | LSC |
| 27 | F | 50 | 74370  | <i>clpP_extron_2-<br/>clpP_extron_1</i> | LSC | 74418  | <i>clpP_extron_2-<br/>clpP_extron_1</i> | LSC |
| 28 | F | 46 | 114060 | <i>ycf1</i>                             | IRA | 114108 | <i>ycf1</i>                             | IRA |
| 29 | P | 46 | 114060 | <i>ycf1</i>                             | IRA | 131288 | <i>ycf1</i>                             | IRB |
| 30 | P | 46 | 114108 | <i>ycf1</i>                             | IRA | 131336 | <i>ycf1</i>                             | IRB |
| 31 | F | 46 | 131288 | <i>ycf1</i>                             | IRB | 131336 | <i>ycf1</i>                             | IRB |
| 32 | F | 37 | 92082  | <i>ycf2</i>                             | IRA | 92139  | <i>ycf2</i>                             | IRA |
| 33 | P | 37 | 92082  | <i>ycf2</i>                             | IRA | 153266 | <i>ycf2</i>                             | IRB |
| 34 | P | 37 | 92139  | <i>ycf2</i>                             | IRA | 153323 | <i>ycf2</i>                             | IRB |
| 35 | F | 37 | 153266 | <i>ycf2</i>                             | IRB | 153323 | <i>ycf2</i>                             | IRB |
| 36 | F | 40 | 131349 | <i>ycf1</i>                             | IRB | 131415 | <i>ycf1</i>                             | IRB |
| 37 | P | 36 | 36461  | <i>psbC-trnS-UGA</i>                    | LSC | 36509  | <i>psbC-trnS-UGA</i>                    | LSC |
| 38 | P | 35 | 5924   | <i>trnK-UUU-rps16</i>                   | LSC | 103584 | <i>trnV-GAC-rrn16</i>                   | IRA |

|                                        |   |     |        |                                    |     |        |                          |     |
|----------------------------------------|---|-----|--------|------------------------------------|-----|--------|--------------------------|-----|
| 39                                     | F | 35  | 5924   | <i>trnK-UUU-rps16</i>              | LSC | 141823 | <i>rrn16-trnV-GAC</i>    | IRB |
| 40                                     | P | 35  | 65686  | <i>petA-psbJ</i>                   | LSC | 65728  | <i>petA-psbJ</i>         | LSC |
| 41                                     | P | 43  | 49669  | <i>trnL-UAA-trnF-GAA</i>           | LSC | 49669  | <i>trnL-UAA-trnF-GAA</i> | LSC |
| 42                                     | F | 43  | 113905 | <i>ycf1</i>                        | IRA | 113917 | <i>ycf1</i>              | IRA |
| 43                                     | P | 43  | 113905 | <i>ycf1</i>                        | IRA | 131482 | <i>ycf1</i>              | IRB |
| 44                                     | P | 43  | 113917 | <i>ycf1</i>                        | IRA | 131494 | <i>ycf1</i>              | IRB |
| 45                                     | F | 43  | 131482 | <i>ycf1</i>                        | IRB | 131494 | <i>ycf1</i>              | IRB |
| 46                                     | F | 33  | 131301 | <i>ycf1</i>                        | IRB | 131349 | <i>ycf1</i>              | IRB |
| 47                                     | F | 39  | 44928  | <i>ycf3_extron_2-ycf3_extron_1</i> | LSC | 102025 | <i>rps12-trnV-GAC</i>    | IRA |
| 48                                     | P | 39  | 44928  | <i>ycf3_extron_2-ycf3_extron_1</i> | LSC | 143378 | <i>trnV-GAC-rps12</i>    | IRB |
| 49                                     | P | 36  | 8657   | <i>psbI-trnS-GCU</i>               | LSC | 46664  | <i>trnS-GGA</i>          | LSC |
| <i>Epimedium_pseudowushanense_GZNW</i> |   |     |        |                                    |     |        |                          |     |
| 1                                      | P | 131 | 5836   | <i>trnK-UUU-rps16</i>              | LSC | 103606 | <i>trnV-GAC-rrn16</i>    | IRA |
| 2                                      | F | 131 | 5836   | <i>trnK-UUU-rps16</i>              | LSC | 141993 | <i>rrn16</i>             | IRB |
| 3                                      | F | 107 | 4644   | <i>trnK-UUU-rps16</i>              | LSC | 109608 | <i>rrn23</i>             | IRA |
| 4                                      | P | 107 | 4644   | <i>trnK-UUU-rps16</i>              | LSC | 136015 | <i>rrn23</i>             | IRB |
| 5                                      | F | 82  | 114010 | <i>ycf1</i>                        | IRA | 114124 | <i>ycf1</i>              | IRA |
| 6                                      | P | 82  | 114010 | <i>ycf1</i>                        | IRA | 131524 | <i>ycf1</i>              | IRB |
| 7                                      | P | 82  | 114124 | <i>ycf1</i>                        | IRA | 131638 | <i>ycf1</i>              | IRB |
| 8                                      | F | 82  | 131524 | <i>ycf1</i>                        | IRB | 131638 | <i>ycf1</i>              | IRB |
| 9                                      | P | 71  | 62184  | <i>accD-psaI</i>                   | LSC | 62184  | <i>accD-psaI</i>         | LSC |
| 10                                     | F | 77  | 4754   | <i>trnK-UUU-rps16</i>              | LSC | 109720 | <i>rrn23</i>             | IRA |
| 11                                     | P | 77  | 4754   | <i>trnK-UUU-rps16</i>              | LSC | 135933 | <i>rrn23</i>             | IRB |
| 12                                     | F | 62  | 131544 | <i>ycf1</i>                        | IRB | 131658 | <i>ycf1</i>              | IRB |
| 13                                     | F | 53  | 4698   | <i>trnK-UUU-rps16</i>              | LSC | 109662 | <i>rrn23</i>             | IRA |
| 14                                     | P | 53  | 4698   | <i>trnK-UUU-rps16</i>              | LSC | 136015 | <i>rrn23</i>             | IRB |
| 15                                     | P | 48  | 54741  | <i>trnV-UAC-trnM-CAU</i>           | LSC | 54741  | <i>trnV-UAC-trnM-CAU</i> | LSC |
| 16                                     | F | 47  | 92098  | <i>ycf2</i>                        | IRA | 92161  | <i>ycf2</i>              | IRA |
| 17                                     | P | 47  | 92098  | <i>ycf2</i>                        | IRA | 153522 | <i>ycf2</i>              | IRB |
| 18                                     | P | 47  | 92161  | <i>ycf2</i>                        | IRA | 153585 | <i>ycf2</i>              | IRB |

|    |   |    |        |                                         |     |        |                                         |     |
|----|---|----|--------|-----------------------------------------|-----|--------|-----------------------------------------|-----|
| 19 | F | 47 | 153522 | <i>ycf2</i>                             | IRB | 153585 | <i>ycf2</i>                             | IRB |
| 20 | F | 53 | 114008 | <i>ycf1</i>                             | IRA | 114074 | <i>ycf1</i>                             | IRA |
| 21 | P | 53 | 114008 | <i>ycf1</i>                             | IRA | 131603 | <i>ycf1</i>                             | IRB |
| 22 | P | 53 | 114074 | <i>ycf1</i>                             | IRA | 131669 | <i>ycf1</i>                             | IRB |
| 23 | F | 53 | 131603 | <i>ycf1</i>                             | IRB | 131669 | <i>ycf1</i>                             | IRB |
| 24 | F | 49 | 4782   | <i>trnK-UUU-rps16</i>                   | LSC | 109748 | <i>rrn23</i>                            | IRA |
| 25 | P | 49 | 4782   | <i>trnK-UUU-rps16</i>                   | LSC | 135933 | <i>rrn23</i>                            | IRB |
| 26 | P | 49 | 98030  | <i>trnL-CAA-ndhB</i>                    | IRA | 98030  | <i>trnL-CAA-ndhB</i>                    | IRA |
| 27 | F | 49 | 98030  | <i>trnL-CAA-ndhB</i>                    | IRA | 147651 | <i>ndhB-trnL-CAA</i>                    | IRB |
| 28 | P | 49 | 147651 | <i>ndhB-trnL-CAA</i>                    | IRB | 147651 | <i>ndhB-trnL-CAA</i>                    | IRB |
| 29 | P | 44 | 29986  | <i>petN-psbM</i>                        | LSC | 29986  | <i>petN-psbM</i>                        | LSC |
| 30 | F | 47 | 72205  | <i>rps12-clpP</i>                       | LSC | 72250  | <i>rps12-clpP</i>                       | LSC |
| 31 | F | 50 | 74395  | <i>clpP_extron_2-<br/>clpP_extron_1</i> | LSC | 74443  | <i>clpP_extron_2-<br/>clpP_extron_1</i> | LSC |
| 32 | F | 46 | 114081 | <i>ycf1</i>                             | IRA | 114129 | <i>ycf1</i>                             | IRA |
| 33 | P | 46 | 114081 | <i>ycf1</i>                             | IRA | 131555 | <i>ycf1</i>                             | IRB |
| 34 | P | 46 | 114129 | <i>ycf1</i>                             | IRA | 131603 | <i>ycf1</i>                             | IRB |
| 35 | F | 46 | 131555 | <i>ycf1</i>                             | IRB | 131603 | <i>ycf1</i>                             | IRB |
| 36 | F | 40 | 131616 | <i>ycf1</i>                             | IRB | 131682 | <i>ycf1</i>                             | IRB |
| 37 | P | 35 | 5932   | <i>trnK-UUU-rps16</i>                   | LSC | 103606 | <i>trnV-GAC-rrn16</i>                   | IRA |
| 38 | F | 35 | 5932   | <i>trnK-UUU-rps16</i>                   | LSC | 142089 | <i>rrn16-trnV-GAC</i>                   | IRB |
| 39 | P | 35 | 65711  | <i>petA-psbJ</i>                        | LSC | 65753  | <i>petA-psbJ</i>                        | LSC |
| 40 | P | 43 | 49687  | <i>trnL-UAA-trnF-GAA</i>                | LSC | 49687  | <i>trnL-UAA-trnF-GAA</i>                | LSC |
| 41 | F | 43 | 113926 | <i>ycf1</i>                             | IRA | 113938 | <i>ycf1</i>                             | IRA |
| 42 | P | 43 | 113926 | <i>ycf1</i>                             | IRA | 131749 | <i>ycf1</i>                             | IRB |
| 43 | P | 43 | 113938 | <i>ycf1</i>                             | IRA | 131761 | <i>ycf1</i>                             | IRB |
| 44 | F | 43 | 131749 | <i>ycf1</i>                             | IRB | 131761 | <i>ycf1</i>                             | IRB |
| 45 | F | 33 | 131568 | <i>ycf1</i>                             | IRB | 131616 | <i>ycf1</i>                             | IRB |
| 46 | F | 39 | 44953  | <i>ycf3_extron_2-<br/>ycf3_extron_1</i> | LSC | 102047 | <i>rps12-trnV-GAC</i>                   | IRA |
| 47 | P | 39 | 44953  | <i>ycf3_extron_2-<br/>ycf3_extron_1</i> | LSC | 143644 | <i>trnV-GAC-rps12</i>                   | IRB |

|                                   |   |     |        |                          |     |        |                          |     |
|-----------------------------------|---|-----|--------|--------------------------|-----|--------|--------------------------|-----|
| 48                                | P | 36  | 8656   | <i>psbI-trnS-GCU</i>     | LSC | 46689  | <i>trnS-GGA</i>          | LSC |
| 49                                | F | 32  | 5511   | <i>trnK-UUU-rps16</i>    | LSC | 5662   | <i>trnK-UUU-rps16</i>    | LSC |
| <i>Epimedium ilicifolium_SXBX</i> |   |     |        |                          |     |        |                          |     |
| 1                                 | P | 131 | 5827   | <i>trnK-UUU-rps16</i>    | LSC | 103296 | <i>trnV-GAC-rrn16</i>    | IRA |
| 2                                 | F | 131 | 5827   | <i>trnK-UUU-rps16</i>    | LSC | 141644 | <i>rrn16</i>             | IRB |
| 3                                 | F | 107 | 4634   | <i>trnK-UUU-rps16</i>    | LSC | 109298 | <i>rrn23</i>             | IRA |
| 4                                 | P | 107 | 4634   | <i>trnK-UUU-rps16</i>    | LSC | 135666 | <i>rrn23</i>             | IRB |
| 5                                 | F | 82  | 113701 | <i>ycf1</i>              | IRA | 113815 | <i>ycf1</i>              | IRA |
| 6                                 | P | 82  | 113701 | <i>ycf1</i>              | IRA | 131174 | <i>ycf1</i>              | IRB |
| 7                                 | P | 82  | 113815 | <i>ycf1</i>              | IRA | 131288 | <i>ycf1</i>              | IRB |
| 8                                 | F | 82  | 131174 | <i>ycf1</i>              | IRB | 131288 | <i>ycf1</i>              | IRB |
| 9                                 | P | 71  | 62201  | <i>accD-psaI</i>         | LSC | 62201  | <i>accD-psaI</i>         | LSC |
| 10                                | F | 77  | 4744   | <i>trnK-UUU-rps16</i>    | LSC | 109410 | <i>rrn23</i>             | IRA |
| 11                                | P | 77  | 4744   | <i>trnK-UUU-rps16</i>    | LSC | 135584 | <i>rrn23</i>             | IRB |
| 12                                | F | 62  | 131194 | <i>ycf1</i>              | IRB | 131308 | <i>ycf1</i>              | IRB |
| 13                                | F | 53  | 4688   | <i>trnK-UUU-rps16</i>    | LSC | 109352 | <i>rrn23</i>             | IRA |
| 14                                | P | 53  | 4688   | <i>trnK-UUU-rps16</i>    | LSC | 135666 | <i>rrn23</i>             | IRB |
| 15                                | P | 48  | 54725  | <i>trnV-UAC-trnM-CAU</i> | LSC | 54725  | <i>trnV-UAC-trnM-CAU</i> | LSC |
| 16                                | F | 47  | 91777  | <i>ycf2</i>              | IRA | 91840  | <i>ycf2</i>              | IRA |
| 17                                | P | 47  | 91777  | <i>ycf2</i>              | IRA | 153184 | <i>ycf2</i>              | IRB |
| 18                                | P | 47  | 91840  | <i>ycf2</i>              | IRA | 153247 | <i>ycf2</i>              | IRB |
| 19                                | F | 47  | 153184 | <i>ycf2</i>              | IRB | 153247 | <i>ycf2</i>              | IRB |
| 20                                | F | 53  | 113699 | <i>ycf1</i>              | IRA | 113765 | <i>ycf1</i>              | IRA |
| 21                                | P | 53  | 113699 | <i>ycf1</i>              | IRA | 131253 | <i>ycf1</i>              | IRB |
| 22                                | P | 53  | 113765 | <i>ycf1</i>              | IRA | 131319 | <i>ycf1</i>              | IRB |
| 23                                | F | 53  | 131253 | <i>ycf1</i>              | IRB | 131319 | <i>ycf1</i>              | IRB |
| 24                                | F | 49  | 4772   | <i>trnK-UUU-rps16</i>    | LSC | 109438 | <i>rrn23</i>             | IRA |
| 25                                | P | 49  | 4772   | <i>trnK-UUU-rps16</i>    | LSC | 135584 | <i>rrn23</i>             | IRB |
| 26                                | P | 49  | 97714  | <i>trnL-CAA-ndhB</i>     | IRA | 97714  | <i>trnL-CAA-ndhB</i>     | IRA |
| 27                                | F | 49  | 97714  | <i>trnL-CAA-ndhB</i>     | IRA | 147308 | <i>ndhB-trnL-CAA</i>     | IRB |
| 28                                | P | 49  | 147308 | <i>ndhB-trnL-CAA</i>     | IRB | 147308 | <i>ndhB-trnL-CAA</i>     | IRB |
| 29                                | P | 44  | 29960  | <i>petN-psbM</i>         | LSC | 29960  | <i>petN-psbM</i>         | LSC |



|    |   |    |        |                                         |     |        |                                         |     |
|----|---|----|--------|-----------------------------------------|-----|--------|-----------------------------------------|-----|
| 30 | F | 50 | 74362  | <i>clpP_extron_2-<br/>clpP_extron_1</i> | LSC | 74410  | <i>clpP_extron_2-<br/>clpP_extron_1</i> | LSC |
| 31 | F | 46 | 113772 | <i>ycf1</i>                             | IRA | 113820 | <i>ycf1</i>                             | IRA |
| 32 | P | 46 | 113772 | <i>ycf1</i>                             | IRA | 131205 | <i>ycf1</i>                             | IRB |
| 33 | P | 46 | 113820 | <i>ycf1</i>                             | IRA | 131253 | <i>ycf1</i>                             | IRB |
| 34 | F | 46 | 131205 | <i>ycf1</i>                             | IRB | 131253 | <i>ycf1</i>                             | IRB |
| 35 | F | 44 | 72179  | <i>rps12-clpP</i>                       | LSC | 72224  | <i>rps12-clpP</i>                       | LSC |
| 36 | F | 40 | 131266 | <i>ycf1</i>                             | IRB | 131332 | <i>ycf1</i>                             | IRB |
| 37 | P | 35 | 5923   | <i>trnK-UUU-rps16</i>                   | LSC | 103296 | <i>trnV-GAC-rrn16</i>                   | IRA |
| 38 | F | 35 | 5923   | <i>trnK-UUU-rps16</i>                   | LSC | 141740 | <i>rrn16-trnV-GAC</i>                   | IRB |
| 39 | P | 35 | 65722  | <i>petA-psbJ</i>                        | LSC | 65764  | <i>petA-psbJ</i>                        | LSC |
| 40 | F | 43 | 113617 | <i>ycf1</i>                             | IRA | 113629 | <i>ycf1</i>                             | IRA |
| 41 | P | 43 | 113617 | <i>ycf1</i>                             | IRA | 131399 | <i>ycf1</i>                             | IRB |
| 42 | P | 43 | 113629 | <i>ycf1</i>                             | IRA | 131411 | <i>ycf1</i>                             | IRB |
| 43 | F | 43 | 131399 | <i>ycf1</i>                             | IRB | 131411 | <i>ycf1</i>                             | IRB |
| 44 | F | 33 | 131218 | <i>ycf1</i>                             | IRB | 131266 | <i>ycf1</i>                             | IRB |
| 45 | F | 39 | 44950  | <i>ycf3_extron_2-<br/>ycf3_extron_1</i> | LSC | 101737 | <i>rps12-trnV-GAC</i>                   | IRA |
| 46 | P | 39 | 44950  | <i>ycf3_extron_2-<br/>ycf3_extron_1</i> | LSC | 143295 | <i>trnV-GAC-rps12</i>                   | IRB |
| 47 | P | 36 | 8639   | <i>psbI-trnS-GCU</i>                    | LSC | 46686  | <i>trnS-GGA</i>                         | LSC |
| 48 | F | 32 | 5502   | <i>trnK-UUU-rps16</i>                   | LSC | 5653   | <i>trnK-UUU-rps16</i>                   | LSC |
| 49 | P | 41 | 72175  | <i>rps12-clpP</i>                       | LSC | 107182 | <i>trnA-UGC-rrn23</i>                   | IRA |

Table S5. Voucher information and GenBank accession numbers for the *Epimedium* samples.

| Section   | Series       | Latin name                          | Voucher No. | GenBank Assesion No. | SRA Assesion No. | Location         | Sampling Part |
|-----------|--------------|-------------------------------------|-------------|----------------------|------------------|------------------|---------------|
| Diphyllon | Brachycerae  | <i>Epimedium borealiguizhouense</i> | GZQB        | MK408751             | SAMN12430115     | Guiyang, Guizhou | Leaf          |
|           | Brachycerae  | <i>Epimedium sagittatum</i>         | /           | KU204899             | /                | GenBank          | /             |
|           | Brachycerae  | <i>Epimedium dolichostemon</i>      | /           | KU522470             | /                | GenBank          | /             |
|           | Dolichocerae | <i>Epimedium wushanense</i>         | HBXS        | MK408753             | SAMN12430116     | Xingshan, Hubei  | Leaf          |
|           | Dolichocerae | <i>Epimedium wushanense</i>         | HBXS-2      | MK992920             | SAMN12430117     | Xingshan, Hubei  | Leaf          |
|           | Dolichocerae | <i>Epimedium acuminatum</i>         | /           | KU522469             | /                | GenBank          | /             |

|            |              |                                   |      |          |              |                   |      |
|------------|--------------|-----------------------------------|------|----------|--------------|-------------------|------|
|            | Dolichocerae | <i>Epimedium lishihchenii</i>     | /    | KU522472 | /            | GenBank           | /    |
|            | Dolichocerae | <i>Epimedium chlorandrum</i>      | SCMP | MK408754 | SAMN12430118 | Baoxing, Sichuan  | Leaf |
|            | Davidiana    | <i>Epimedium mikinorii</i>        | HBES | MK408752 | SAMN12430119 | Enshi, Hubei      | Leaf |
|            | Davidiana    | <i>Epimedium mikinorii</i>        | GZLS | MK992918 | SAMN12430120 | Leishan, Guizhou  | Leaf |
|            | Davidiana    | <i>Epimedium ilicifolium</i>      | SXBX | MK992921 | SAMN12430121 | Zhenping, Shaanxi | Leaf |
|            | /            | <i>Epimedium pseudowushanense</i> | GZJH | MK408750 | SAMN12430122 | Jianhe, Guizhou   | Leaf |
|            | /            | <i>Epimedium pseudowushanense</i> | GZNW | MK992919 | SAMN12430123 | Guiyang, Guizhou  | Leaf |
|            | /            | <i>Epimedium pseudowushanense</i> | /    | KU522473 | /            | GenBank           | /    |
|            | /            | <i>Epimedium koreanum</i>         | /    | KM207675 | /            | GenBank           | /    |
| Macroceras | /            | <i>Epimedium koreanum</i>         | /    | KU522471 | /            | GenBank           | /    |

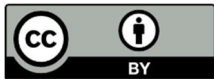

© 2019 by the authors. Licensee MDPI, Basel, Switzerland. This article is an open access article distributed under the terms and conditions of the Creative Commons Attribution (CC BY) license (<http://creativecommons.org/licenses/by/4.0/>).
